# Supplementary material for: Deep Learning Could Diagnose Diabetic Nephropathy with Renal Pathological Immunofluorescent Images
Source: PubMed Central journal article supplement (PMC7400564; doi:10.3390/diagnostics10070466), 2020-07-09
Supplement: diagnostics-10-00466-s001.pdf [file diagnostics-10-00466-s001.pdf]

## Diagnosis of DN

- long term diabetes mellites (more than 5 years)
- Presence of complications, such as DM retinopathy or DM neuropathy
- Presence of persistent proteinuria, such as microalbuminuria. In addition, other glomerular diseases are excluded
- No noticeable hematuria
- Initially increased glomerular filtration rate and / or kidney enlargement

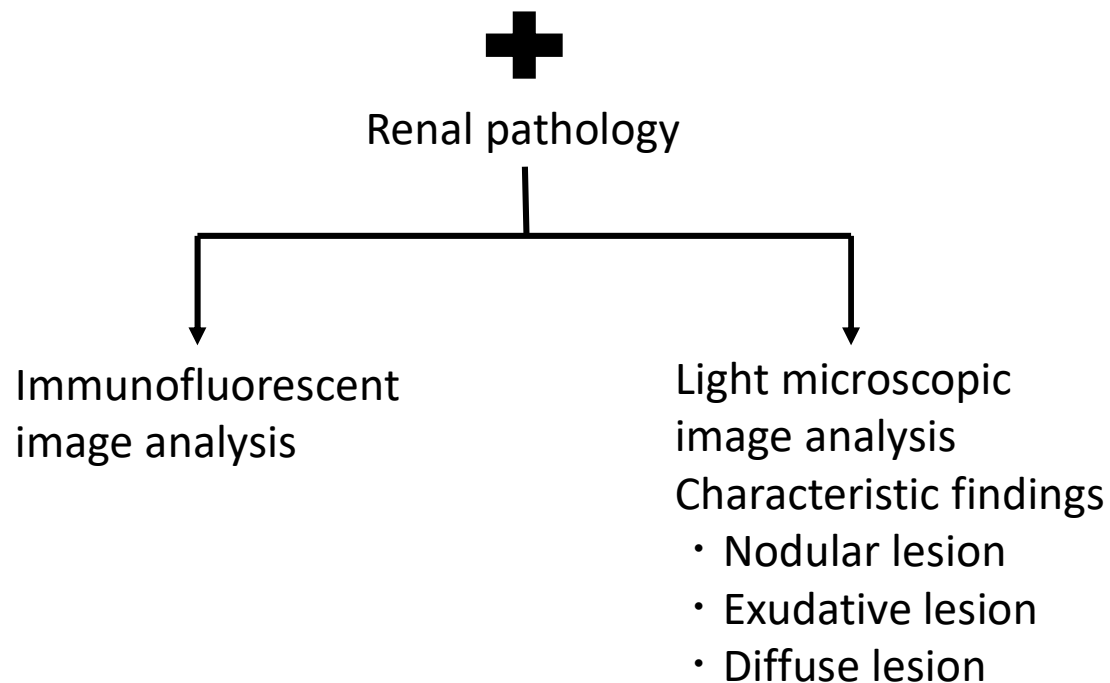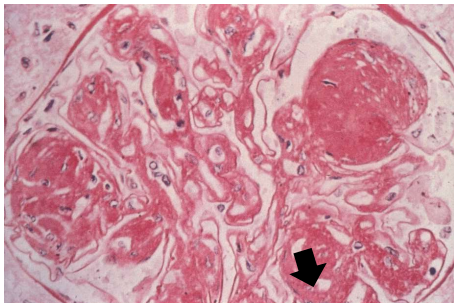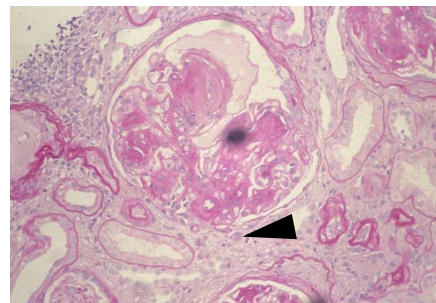

**Arrow:** Nodular lesion, **Arrow head:** Exudative lesion

### Supplemental Fig.S1

The diagnosis method for diabetes mellites nephropathy (DN)

## Supplemental Fig.S2

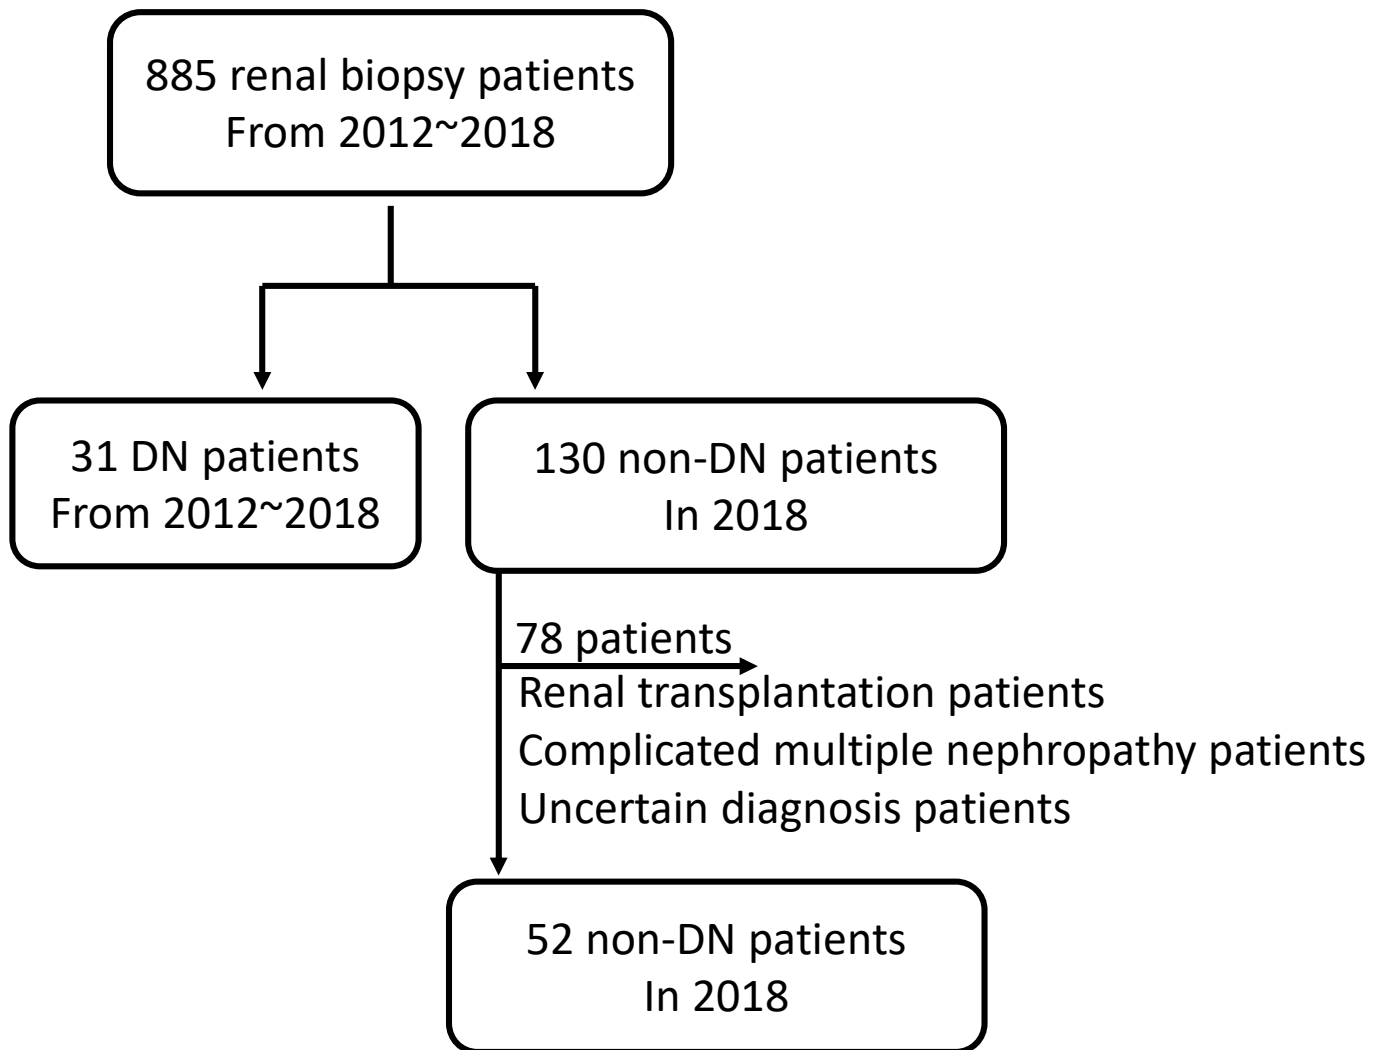

### supplementary Fig. S2

#### Enrolment

All patients underwent renal biopsy in Okayama University Hospital.

## Supplemental Table.ST1

| <b>Diagnosis</b>                                | <b>Patients number</b> |
|-------------------------------------------------|------------------------|
| IgA nephropathy                                 | 17                     |
| Membranous nephropathy                          | 9                      |
| ANCA related nephropathy                        | 5                      |
| Membranous proliferative glomerular nephropathy | 4                      |
| Minor change nephrotic syndrome                 | 3                      |
| Tubulointerstitial nephropathy                  | 3                      |
| Thin basement membrane disease                  | 2                      |
| Immunotactoid disease                           | 1                      |
| Focal segmental glomerular sclerosis            | 1                      |
| Acute tubular necrosis                          | 1                      |
| Glomerular sclerosis                            | 1                      |
| C3 nephropathy                                  | 1                      |
| Amyloid disease                                 | 1                      |
| Obesity related nephropathy                     | 1                      |
| Total                                           | 52                     |

**supplementary Table. ST1  
compared other nephropathy and patient number**

Supplemental Fig. S3a

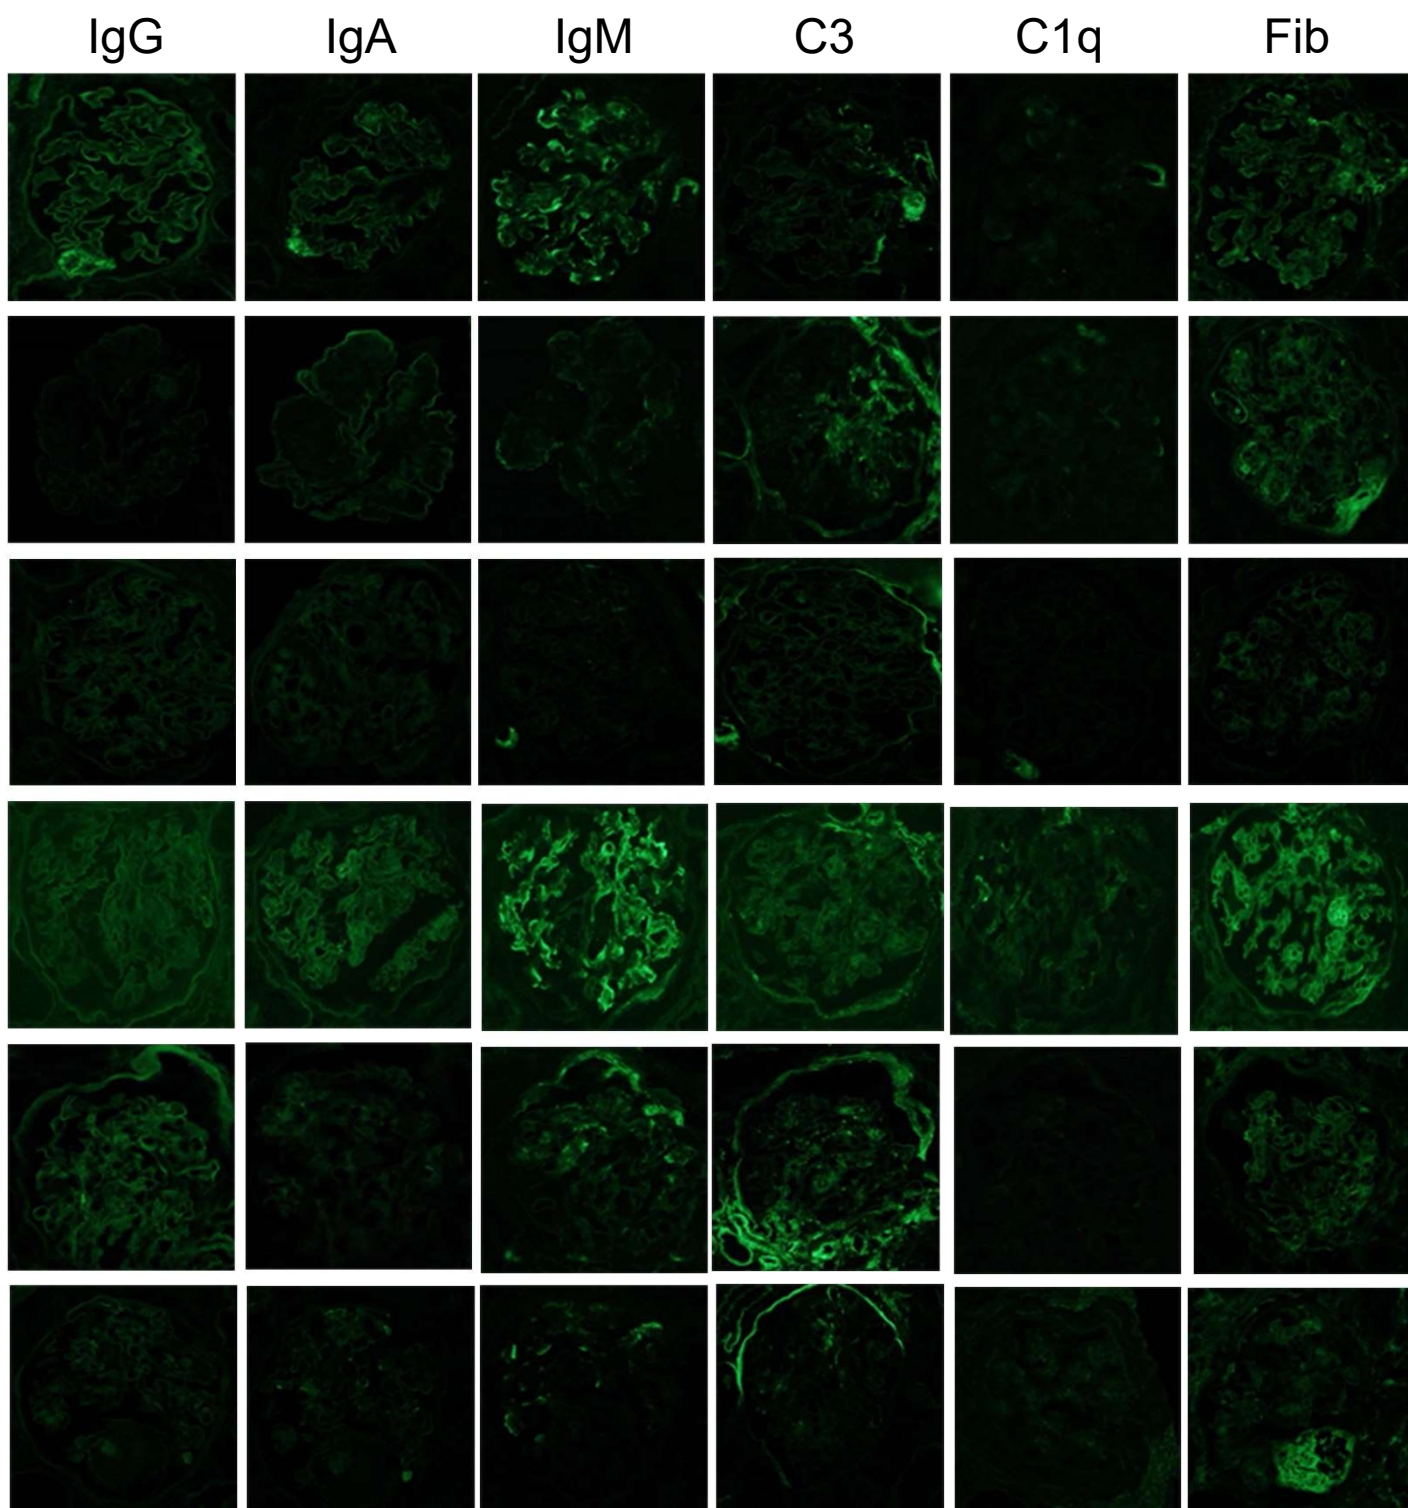

supplementary Figure. S3a  
Test data set for DN

Supplemental Fig.S3b

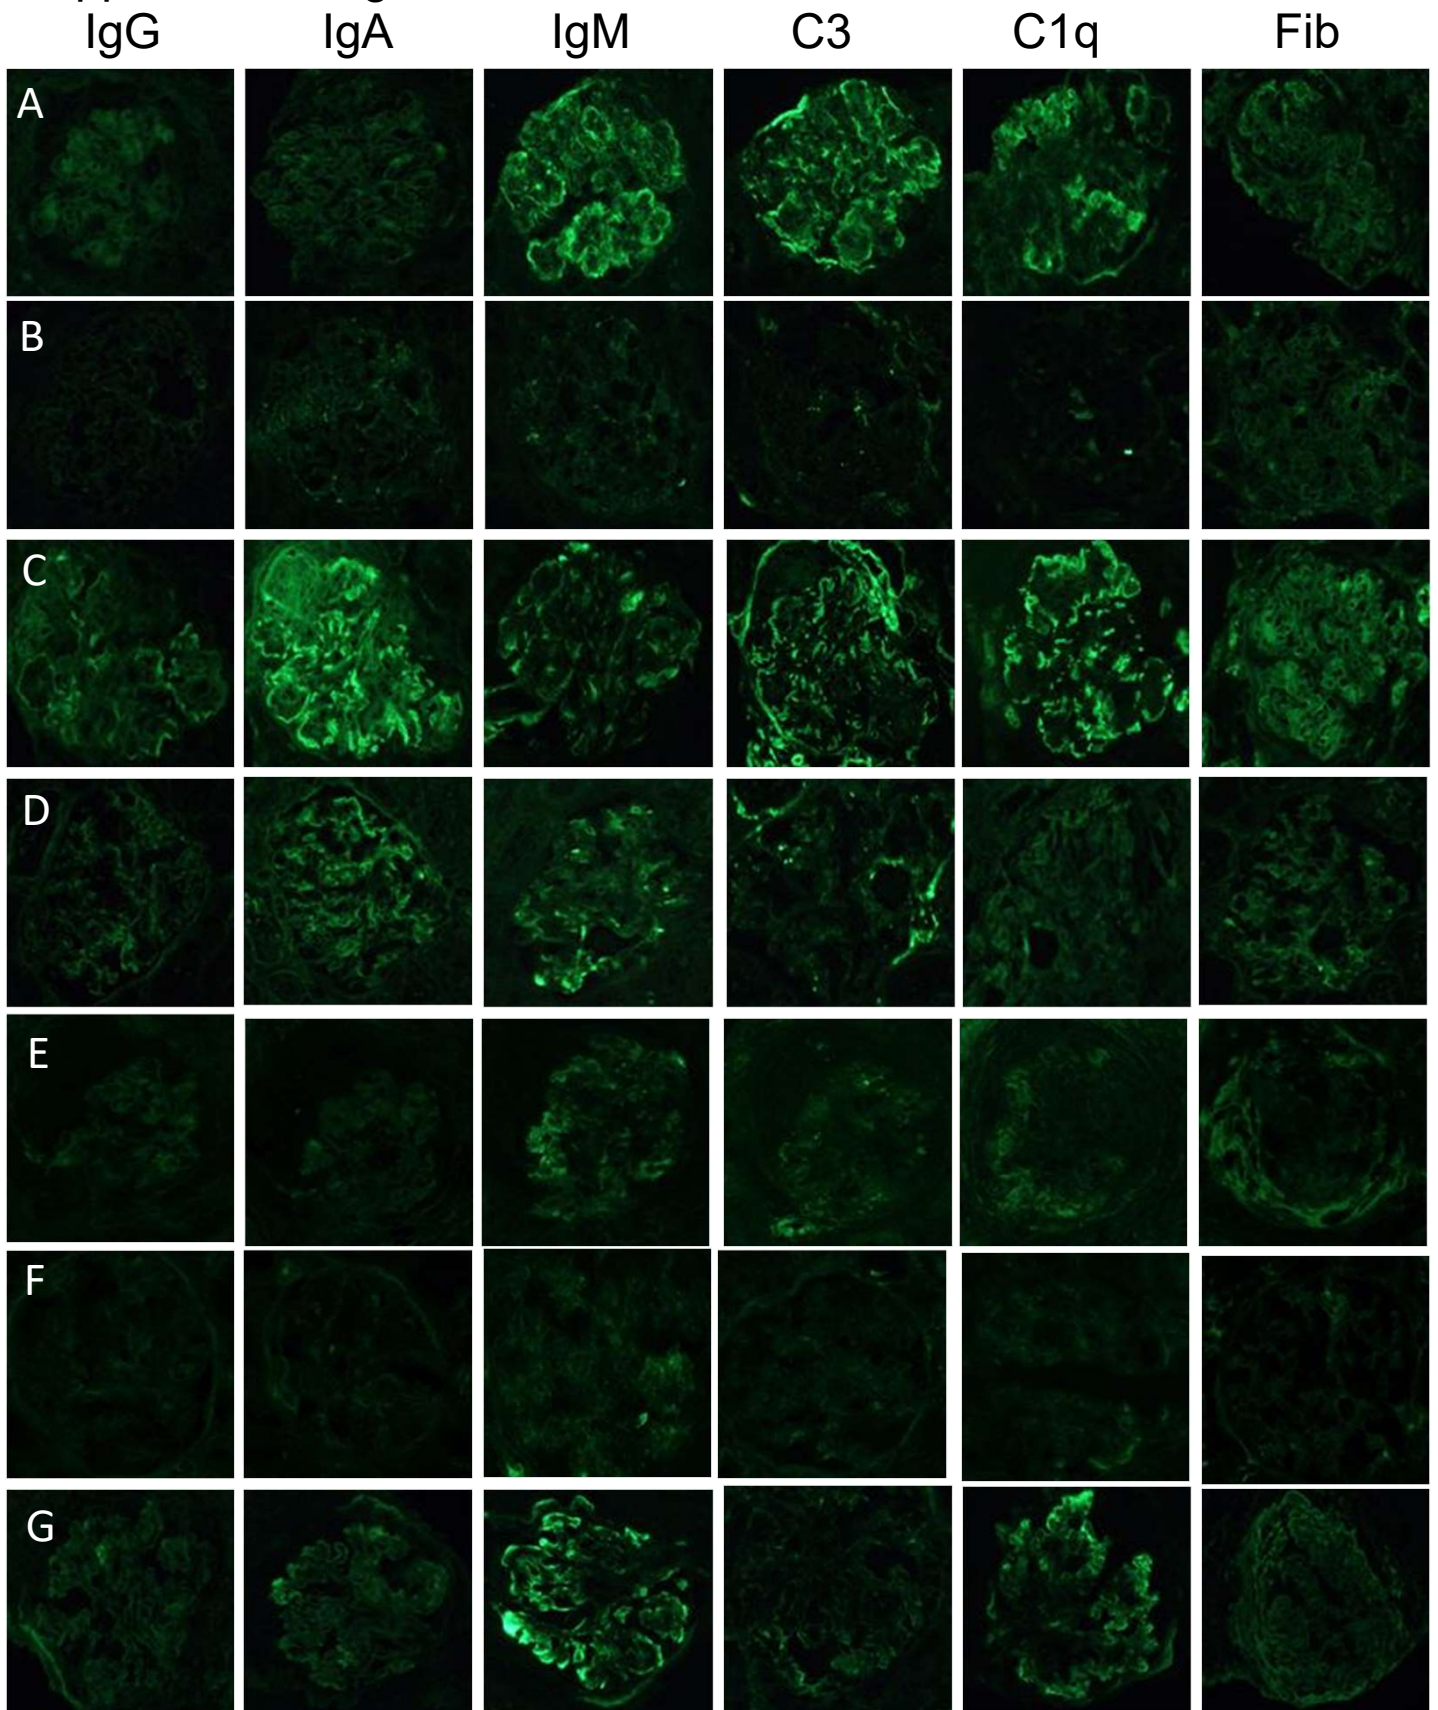

**supplementary Figure. S3b**

**Test data set for non DN:** A: C3 nephropathy, B: FGS (focal segmental glomerular sclerosis), C: MPGN (membranoproliferative glomerulonephritis), D: TBM (thin basement membrane disease) E: MCNS (micro change nephrotic syndrome), F: interstitial nephritis, G: ANCA (antineutrophil cytoplasmic antibody) related disease

## Supplemental Fig.S3c

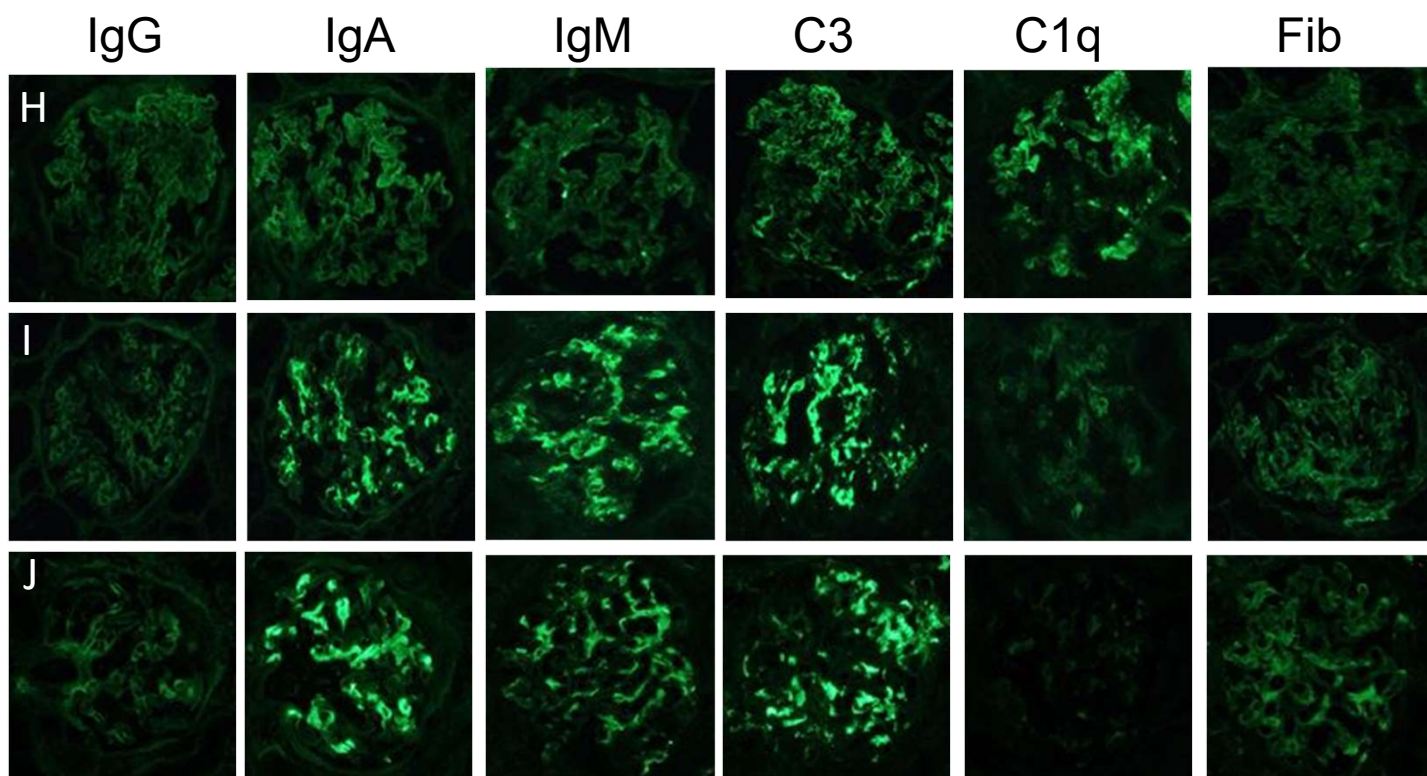

H: MN, I: IgA-N, J: IgA-N

### supplementary Figure. S3c

#### Test data set for non DN

H: MN (Membranous nephropathy), I: IgA-N (IgA nephritis), J: IgA-N

# Supplemental Fig.S4

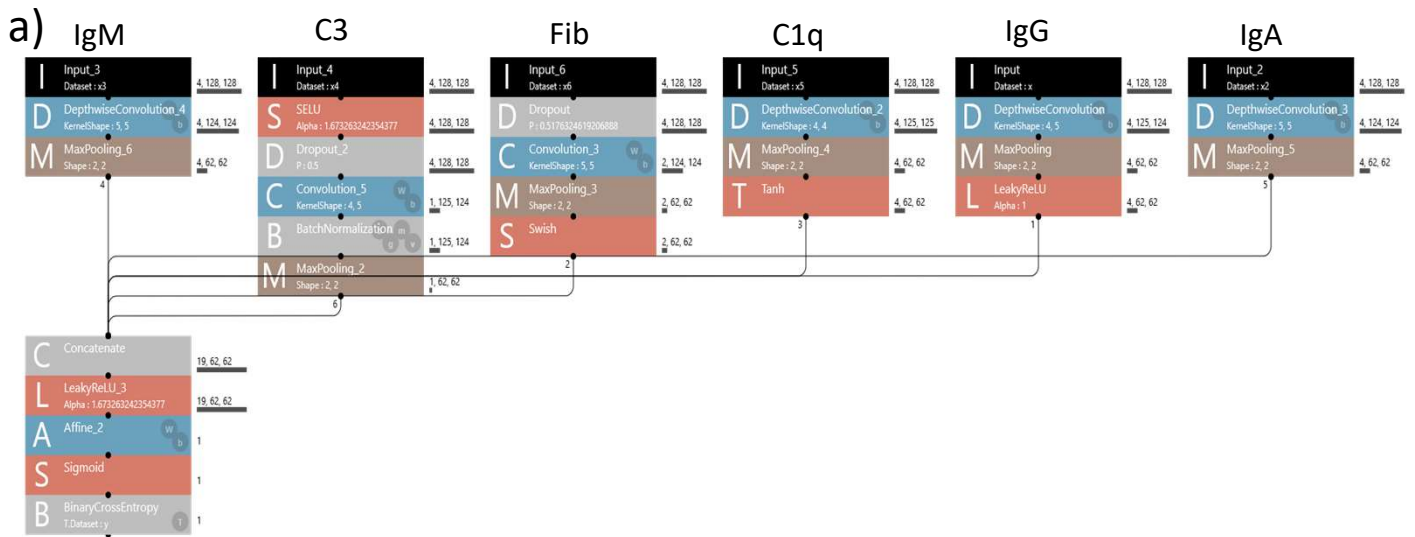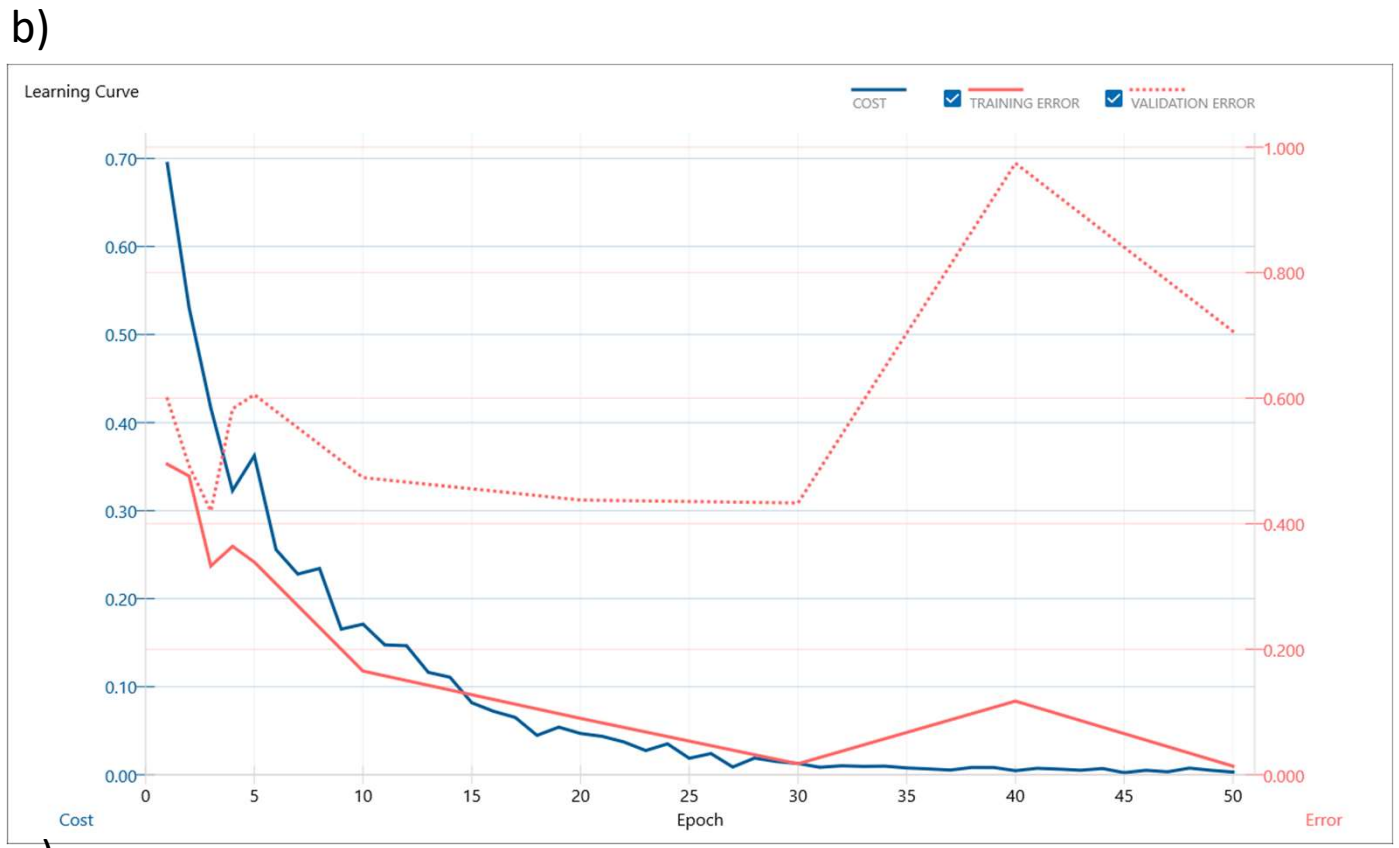

c)

|            | $y'=0$ | $y'=1$ | Recall |
|------------|--------|--------|--------|
| $y=0$      | 4      | 2      | 0.6666 |
| $y=1$      | 2      | 8      | 0.8    |
| Precision  | 0.6666 | 0.8    |        |
| F-Measures | 0.6666 | 0.8    |        |

|                |        |
|----------------|--------|
| Accuracy       | 0.75   |
| Avg.Precision  | 0.7333 |
| Avg.Recall     | 0.7333 |
| Avg.F-Measures | 0.7333 |

## supplementary Figure. S4 representative CNN data

- a) schema of CNN, b) learning curve, c) evaluation data  
 b) ( $y=0$ : DN,  $y=1$ : non DN,  $y'=0$ : estimated DN,  $y'=1$ : estimated non DN)

# Supplemental Fig.S5

CP

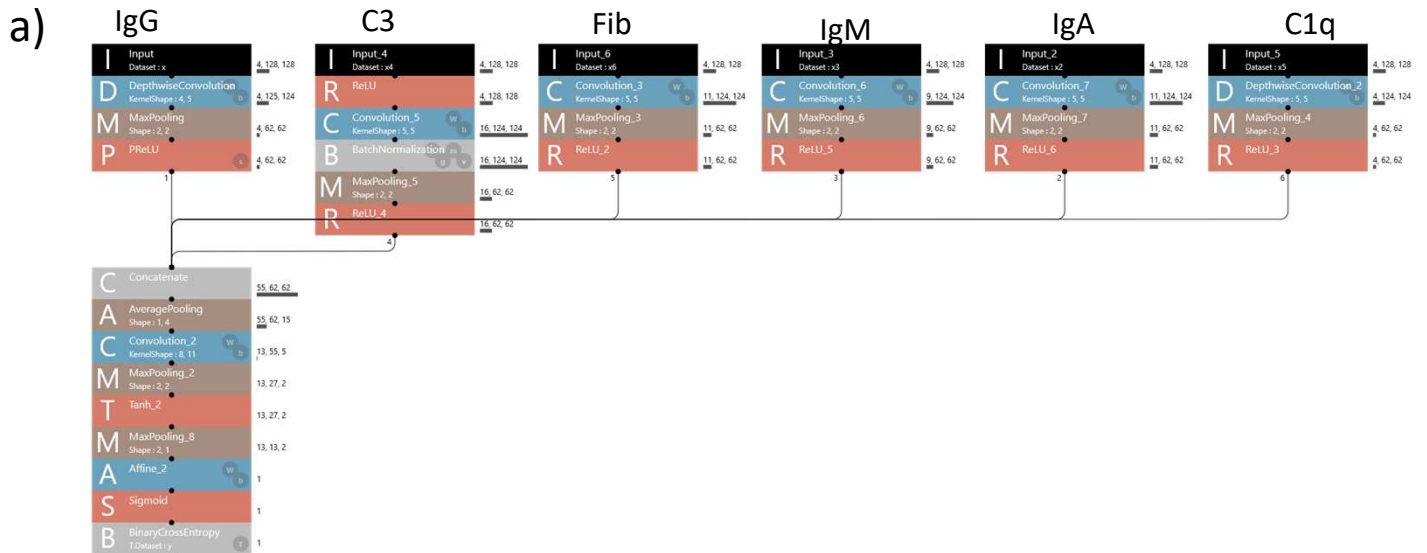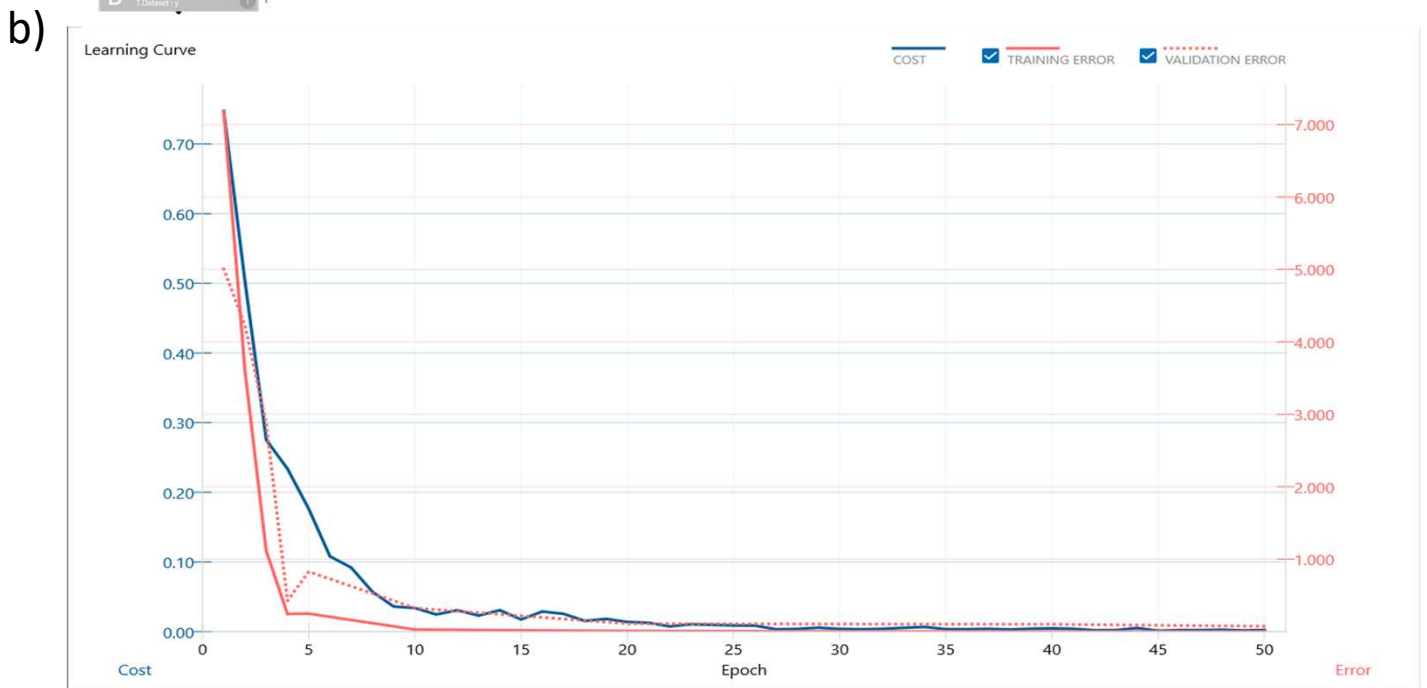

c)

|                    | $y'=0$ | $y'=1$ | Recall |
|--------------------|--------|--------|--------|
| $y:\text{label}=0$ | 6      | 0      | 1      |
| $y:\text{label}=1$ | 0      | 10     | 1      |
| Precision          | 1      | 1      |        |
| F-Measures         | 1      | 1      |        |

|                |   |
|----------------|---|
| Accuracy       | 1 |
| Avg.Precision  | 1 |
| Avg.Recall     | 1 |
| Avg.F-Measures | 1 |

## supplementary Figure. S5

### representative completely diagnosis (CP) CNN data

a) schema of CNN, b) learning curve, c) evaluation data

( $y=0$ : DN,  $y=1$ : non DN,  $y'=0$ : estimated DN,  $y'=1$ : estimated non DN)



# Supplemental Fig.S6a

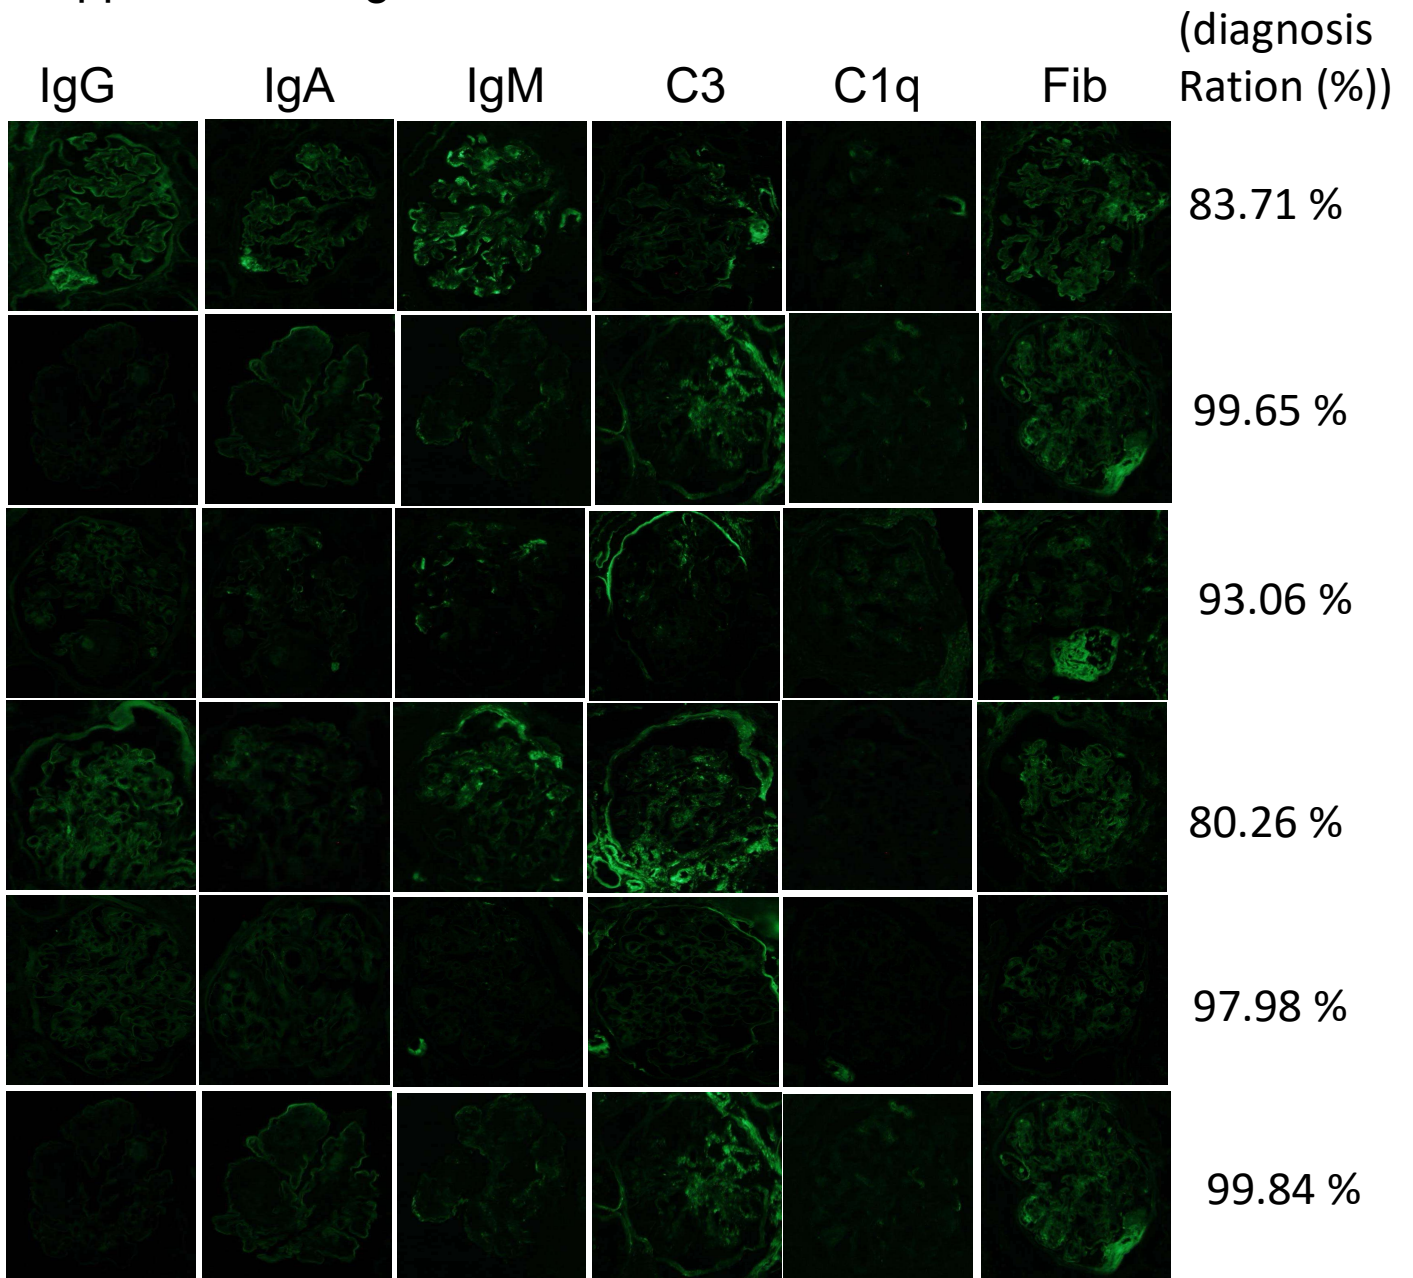

**supplementary Figure. S6a**  
**representative completely (CP) DN diagnosis ration for DN**  
**patients' images**

Supplemental Fig.S6b

| IgG | IgA | IgM | C3 | C1q | Fib | (diagnosis<br>Ration (%))            |
|-----|-----|-----|----|-----|-----|--------------------------------------|
|     |     |     |    |     |     | IgA-N<br>0.26 %                      |
|     |     |     |    |     |     | Interstitial<br>Nephritis<br>20.42 % |
|     |     |     |    |     |     | MCNS<br>16.08 %                      |
|     |     |     |    |     |     | MPGN<br>0.271 %                      |
|     |     |     |    |     |     | FGS<br>16.61 %                       |
|     |     |     |    |     |     | C3<br>nephropathy<br>0.47 %          |
|     |     |     |    |     |     | IgA-N<br>0.11 %                      |
|     |     |     |    |     |     | ANCA<br>7.51 %                       |
|     |     |     |    |     |     | TBM<br>0.33 %                        |
|     |     |     |    |     |     | MN<br>0.22 %                         |

**supplementary Figure. S6b**  
**representative completely (CP) DN diagnosis ration for non DN**  
**patients' images**

# Supplemental Fig.S7 FN

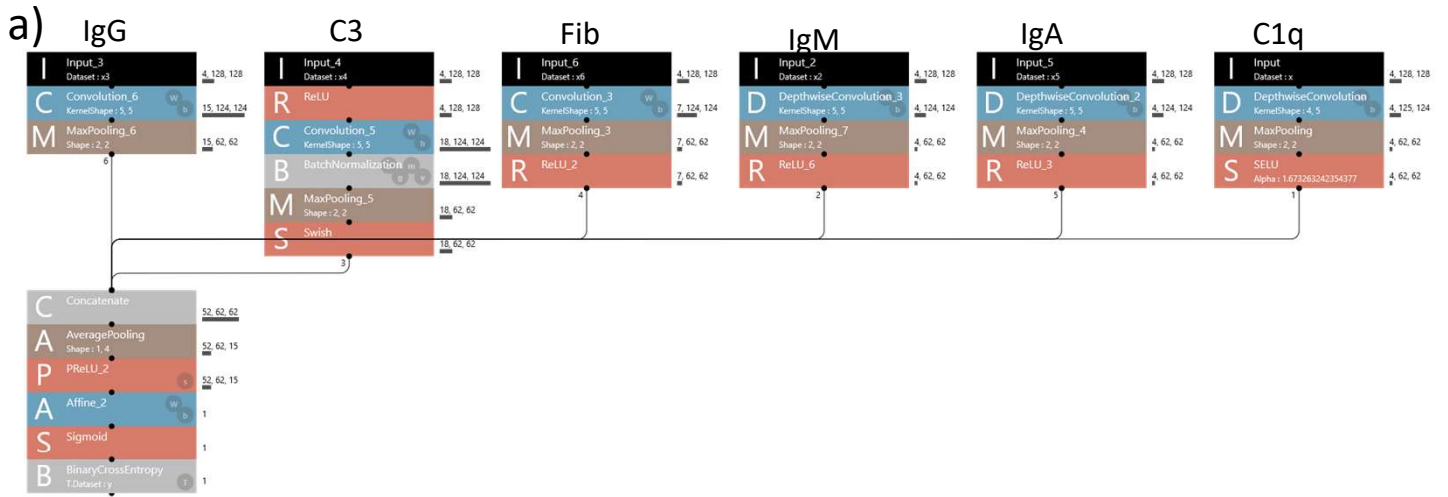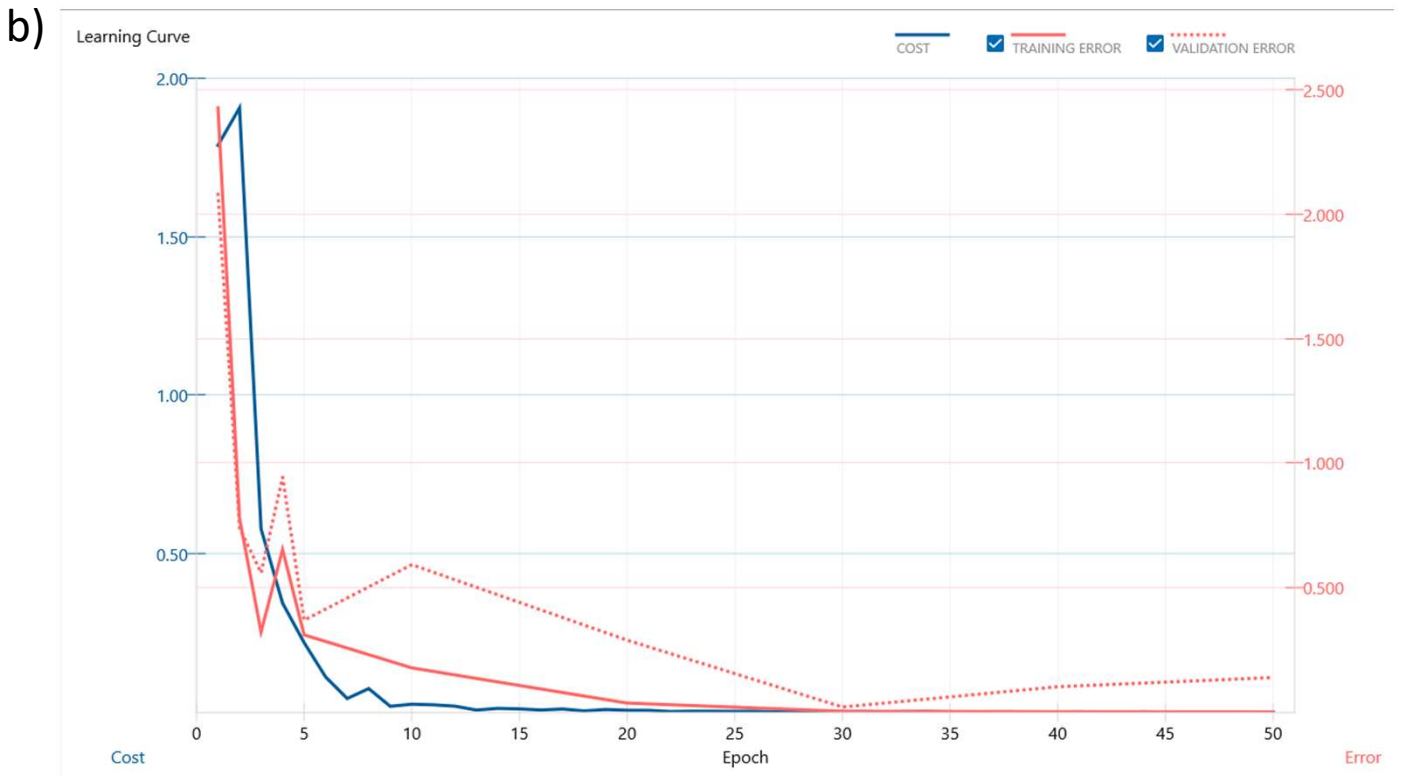

c)

|            | $y'=0$ | $y'=1$ | Recall |
|------------|--------|--------|--------|
| $y=0$      | 4      | 2      | 0.6666 |
| $y=1$      | 0      | 10     | 1      |
| Precision  | 1      | 0.8333 |        |
| F-Measures | 0.7999 | 0.909  |        |

|                    |        |
|--------------------|--------|
| Accuracy           | 0.875  |
| Avg.Preci<br>sion  | 0.9166 |
| Avg.Recall         | 0.8333 |
| Avg.F-<br>Measures | 0.8545 |

## supplementary Figure. S7 representative false negative diagnosis (FN) CNN data

a) schema of CNN, b) learning curve, c) evaluation data  
( $y=0$ : DN,  $y=1$ : non DN,  $y'=0$ : estimated DN,  $y'=1$ : estimated non DN)

# Supplemental Fig.S8a

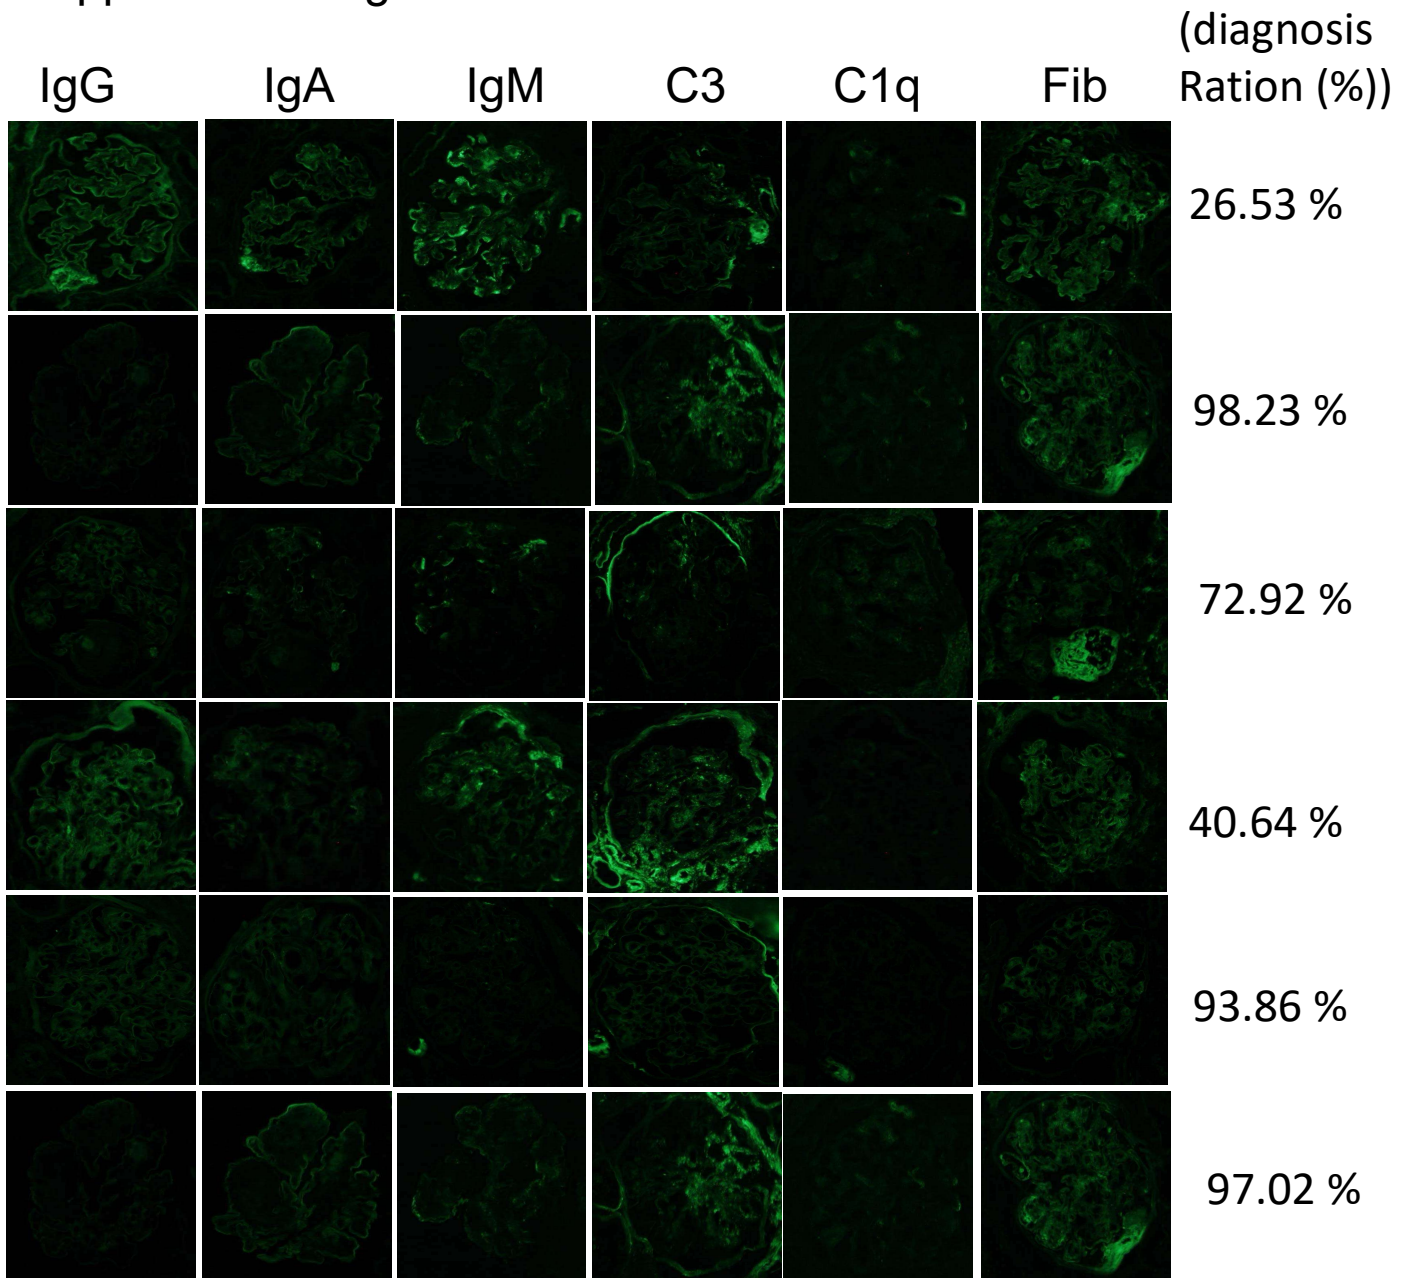

**supplementary Figure. S8a**  
**representative false negative (FN) DN diagnosis ration for DN**  
**patients' images**

Supplemental Fig.S8b

| IgG | IgA | IgM | C3 | C1q | Fib | (diagnosis<br>Ration (%))            |
|-----|-----|-----|----|-----|-----|--------------------------------------|
|     |     |     |    |     |     | IgA-N<br>0.05 %                      |
|     |     |     |    |     |     | Interstitial<br>Nephritis<br>48.83 % |
|     |     |     |    |     |     | MCNS<br>21.53 %                      |
|     |     |     |    |     |     | MPGN<br>0.03 %                       |
|     |     |     |    |     |     | FGS<br>17.14 %                       |
|     |     |     |    |     |     | C3<br>nephropathy<br>0.23 %          |
|     |     |     |    |     |     | IgA-N<br>0.04 %                      |
|     |     |     |    |     |     | ANCA<br>20.15 %                      |
|     |     |     |    |     |     | TBM<br>0.62 %                        |
|     |     |     |    |     |     | MN<br>1.44 %                         |

**supplementary Figure. S8b**  
**representative false negative (FN) DN diagnosis ration for non**  
**DN patients' images**

# Supplemental Fig.S9

FP

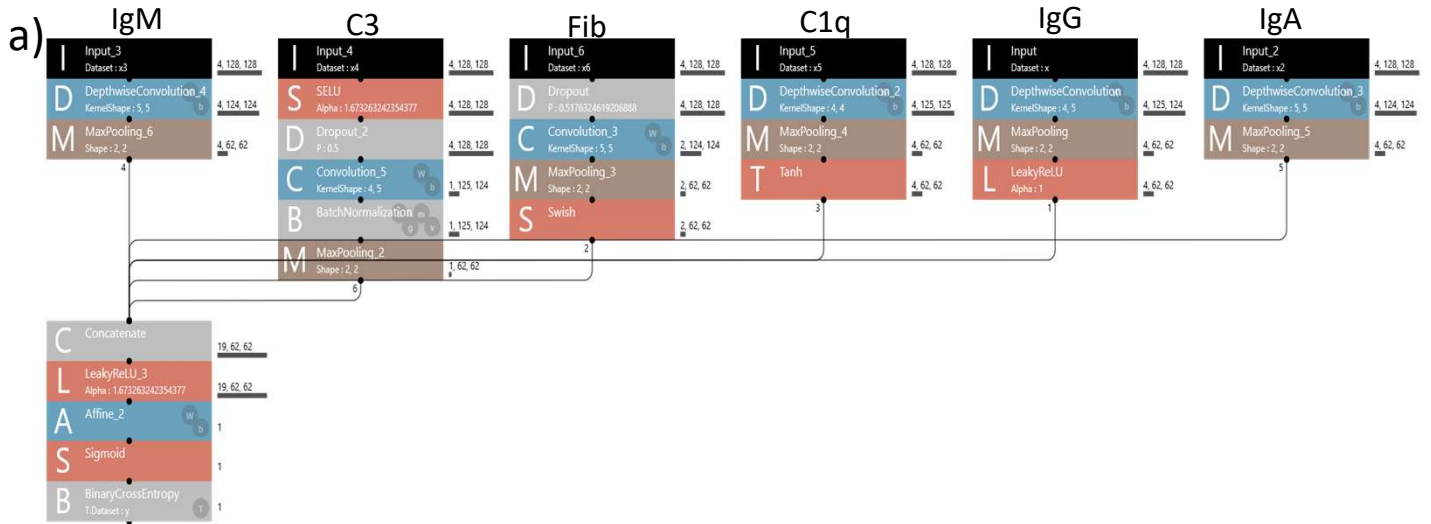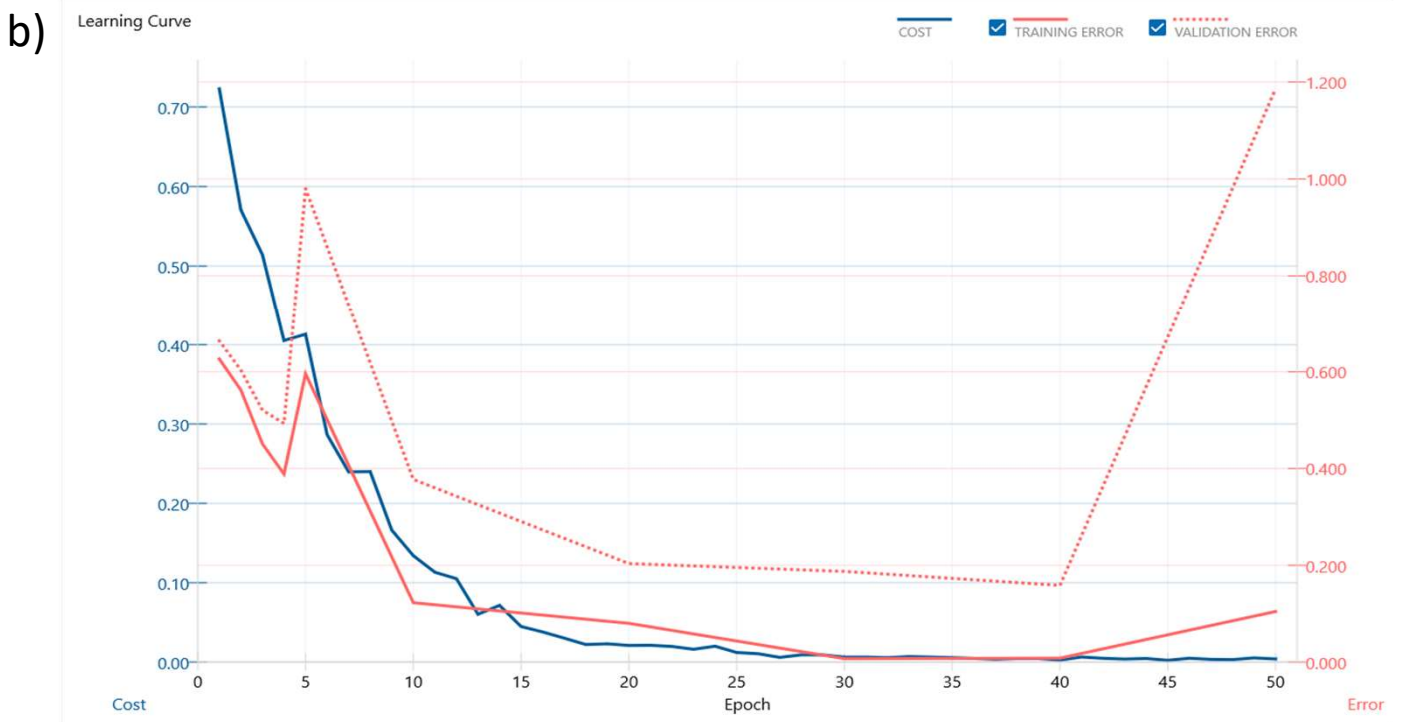

c)

|            | y'=0   | y'=1   | Recall |
|------------|--------|--------|--------|
| y=0        | 6      | 0      | 1      |
| y=1        | 3      | 7      | 0.7    |
| Precision  | 0.6666 | 1      |        |
| F-Measures | 0.7999 | 0.8235 |        |

|                |        |
|----------------|--------|
| Accuracy       | 0.8125 |
| Avg.Precision  | 0.8333 |
| Avg.Recall     | 0.85   |
| Avg.F-Measures | 0.8117 |

## supplementary Figure. S9

### representative false positive diagnosis (FP) CNN data

a) schema of CNN, b) learning curve, c) evaluation data

(y=0: DN, y=1: non DN, y`=0: estimated DN, y`=1: estimated non DN)



Supplemental Fig.S10a

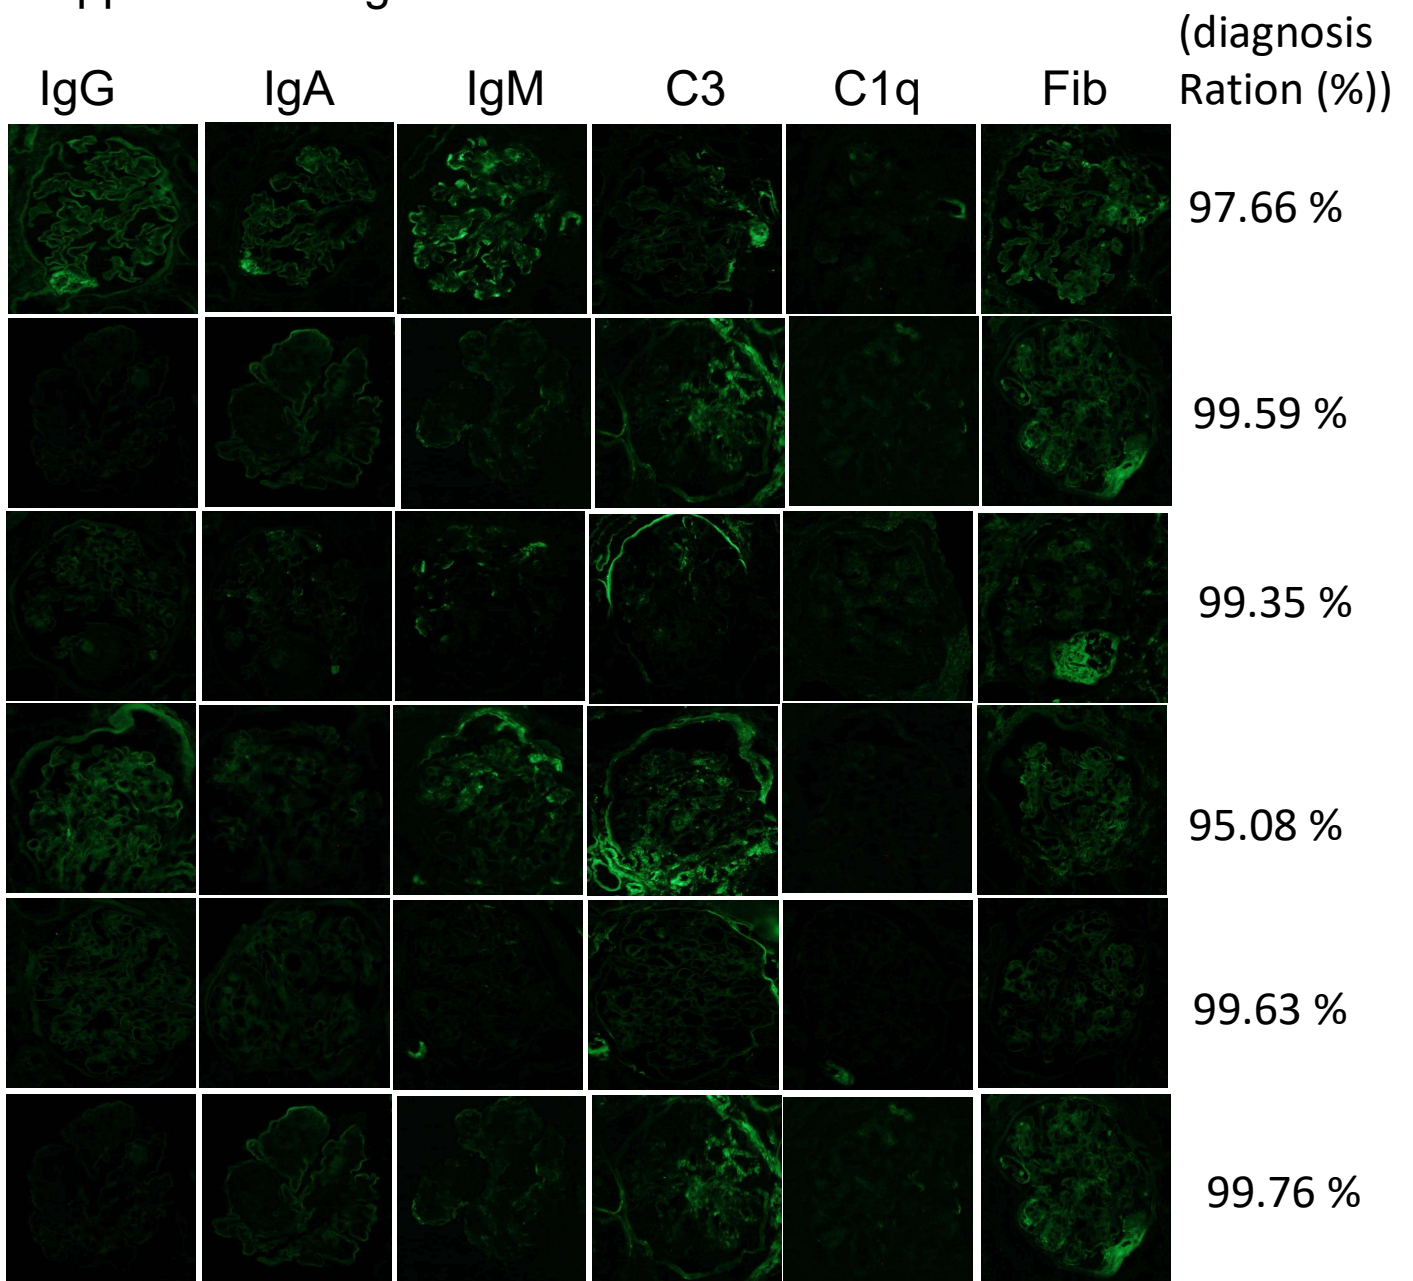

**supplementary Figure. S10a**  
**representative false positive (FP) DN diagnosis ration for DN**  
**patients' images**

Supplemental Fig.S10b

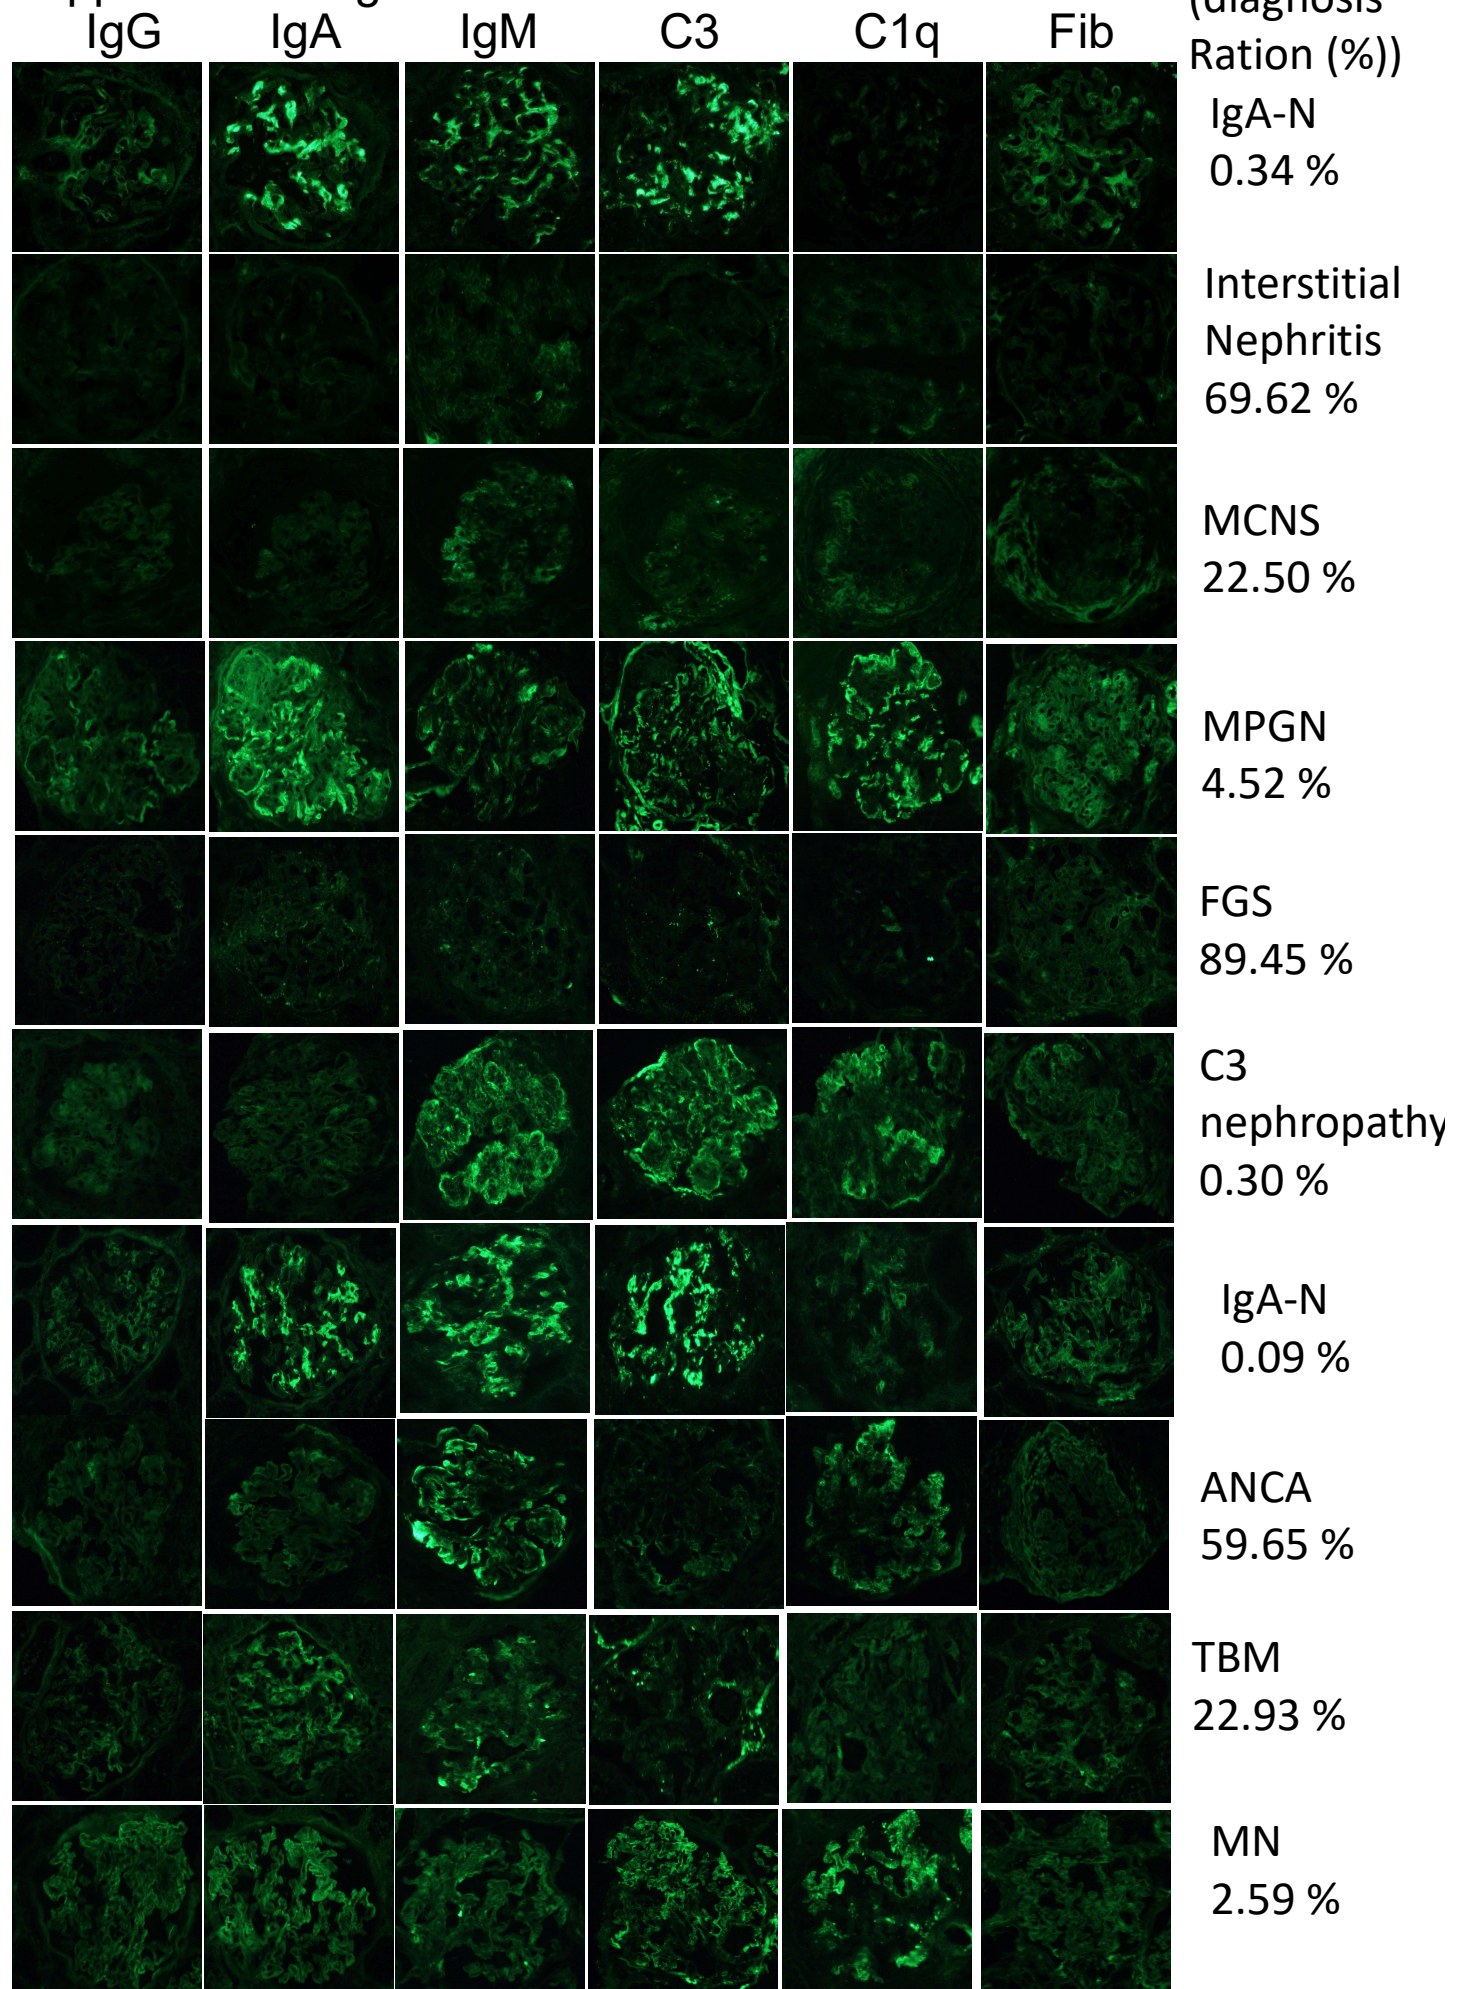

**supplementary Figure. S10b**  
**representative false positive (FP) DN diagnosis ration for non DN**  
**patients' images**

# Supplemental Fig.S11 AV

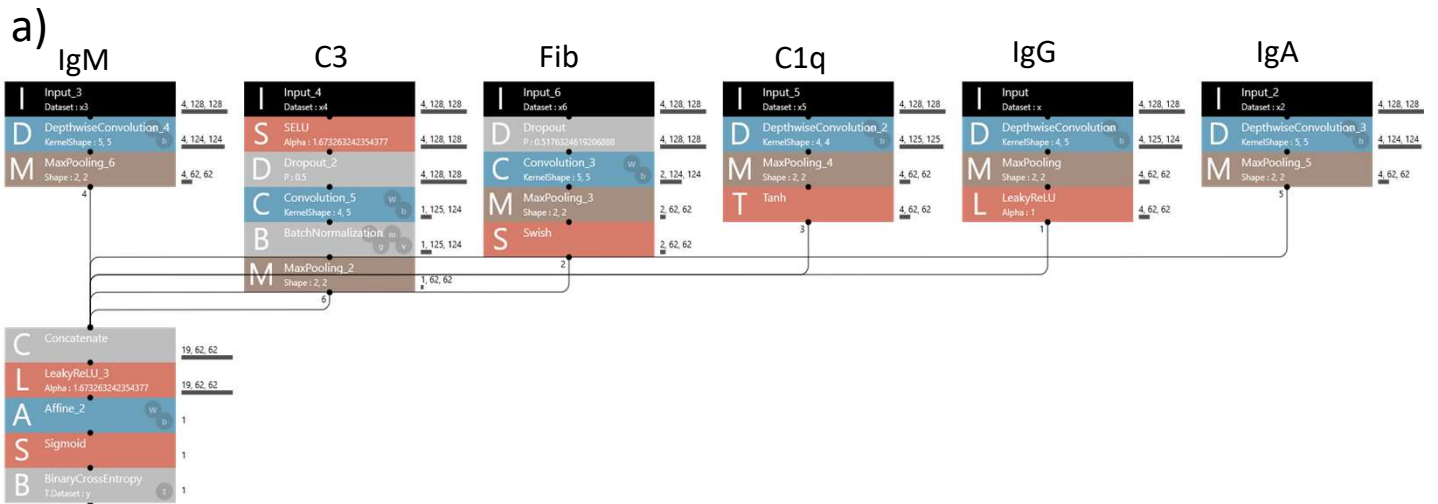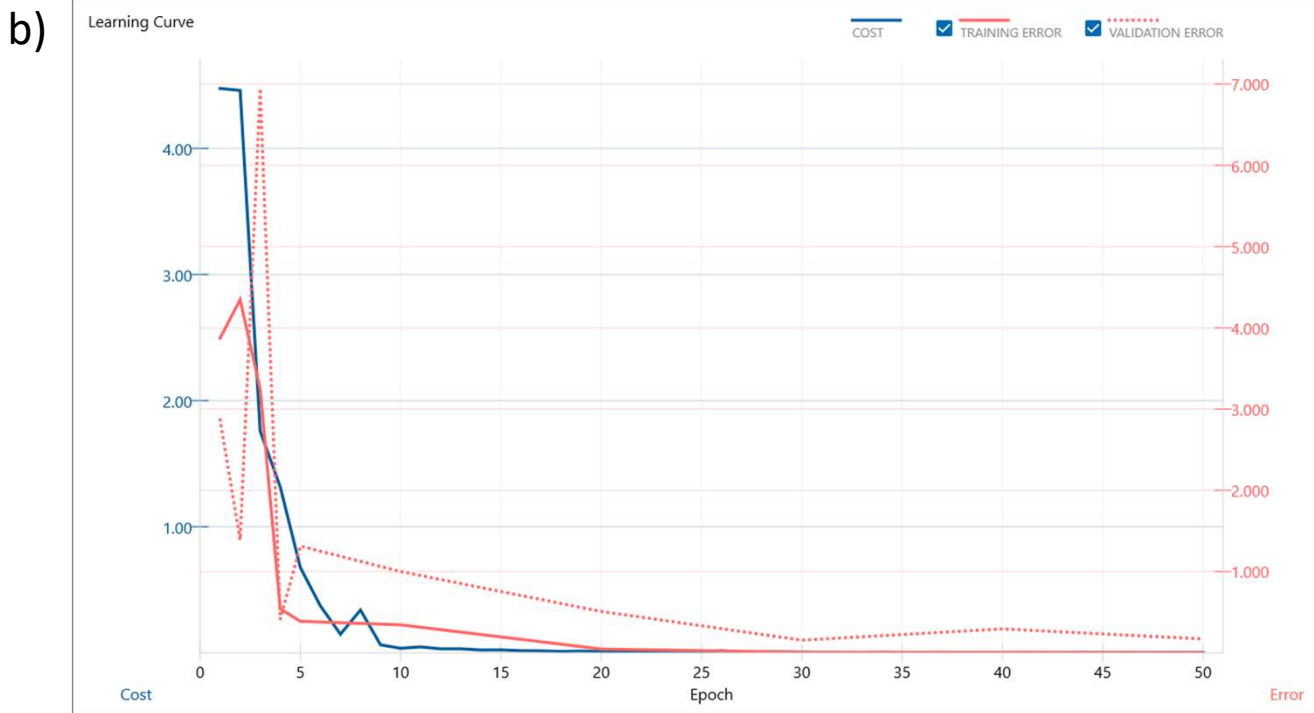

c)

|            | y'=0   | y'=1   | Recall |
|------------|--------|--------|--------|
| y=0        | 4      | 2      | 0.6666 |
| y=1        | 1      | 9      | 0.9    |
| Precision  | 0.8    | 0.8181 |        |
| F-Measures | 0.7272 | 0.857  |        |

|                |        |
|----------------|--------|
| Accuracy       | 0.8125 |
| Avg.Precision  | 0.809  |
| Avg.Recall     | 0.7833 |
| Avg.F-Measures | 0.7921 |

## supplementary Figure. S11

### representative average diagnosis (AV) CNN data

a) schema of CNN, b) learning curve, c) evaluation data

(y=0: DN, y=1: non DN, y`=0: estimated DN, y`=1: estimated non DN)

Supplemental Fig.S12a

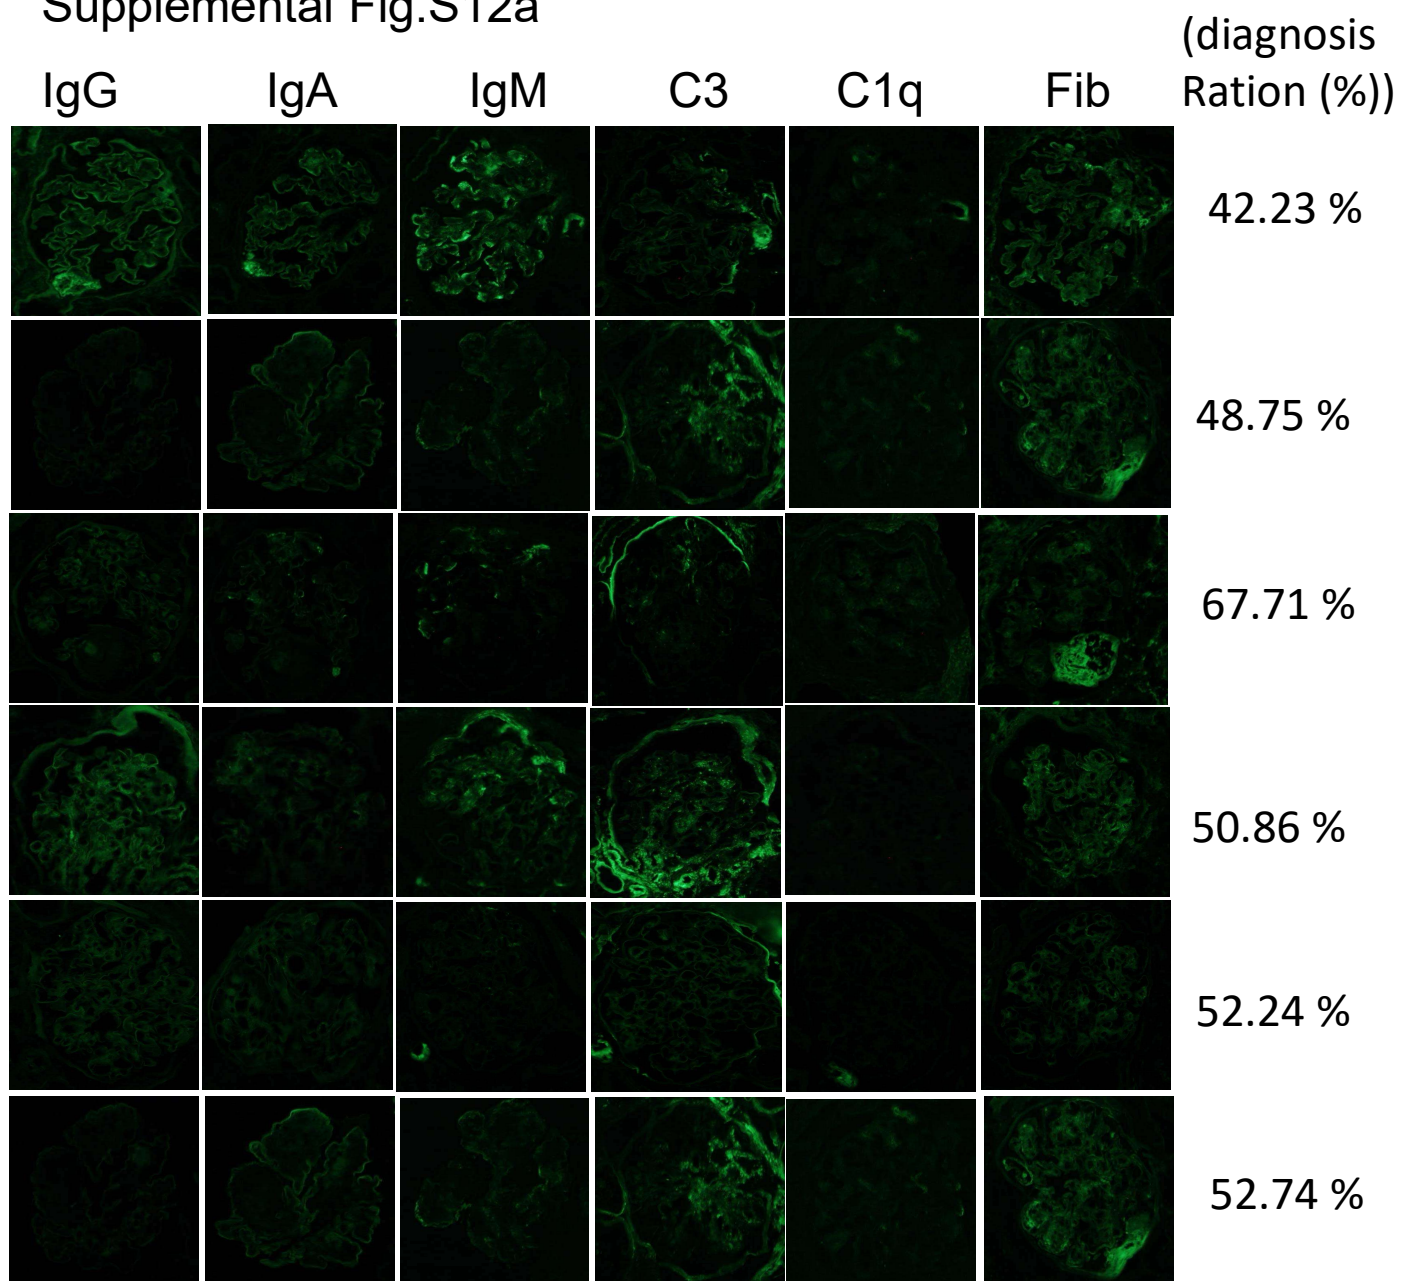

supplementary Figure. S12a

representative average (AV) DN diagnosis ration for DN patients' images

Supplemental Fig.S12b

| IgG | IgA | IgM | C3 | C1q | Fib | (diagnosis<br>Ration (%))            |
|-----|-----|-----|----|-----|-----|--------------------------------------|
|     |     |     |    |     |     | IgA-N<br>2.15 %                      |
|     |     |     |    |     |     | Interstitial<br>Nephritis<br>52.46 % |
|     |     |     |    |     |     | MCNS<br>37.80 %                      |
|     |     |     |    |     |     | MPGN<br>19.76 %                      |
|     |     |     |    |     |     | FGS<br>53.53 %                       |
|     |     |     |    |     |     | C3<br>nephropathy<br>7.06 %          |
|     |     |     |    |     |     | IgA-N<br>0.9 %                       |
|     |     |     |    |     |     | ANCA<br>41.56 %                      |
|     |     |     |    |     |     | TBM<br>48.62 %                       |
|     |     |     |    |     |     | MN<br>38.26 %                        |

**supplementary Figure. S12b**  
**representative average (AV) DN diagnosis ration for non DN**  
**patients' images**

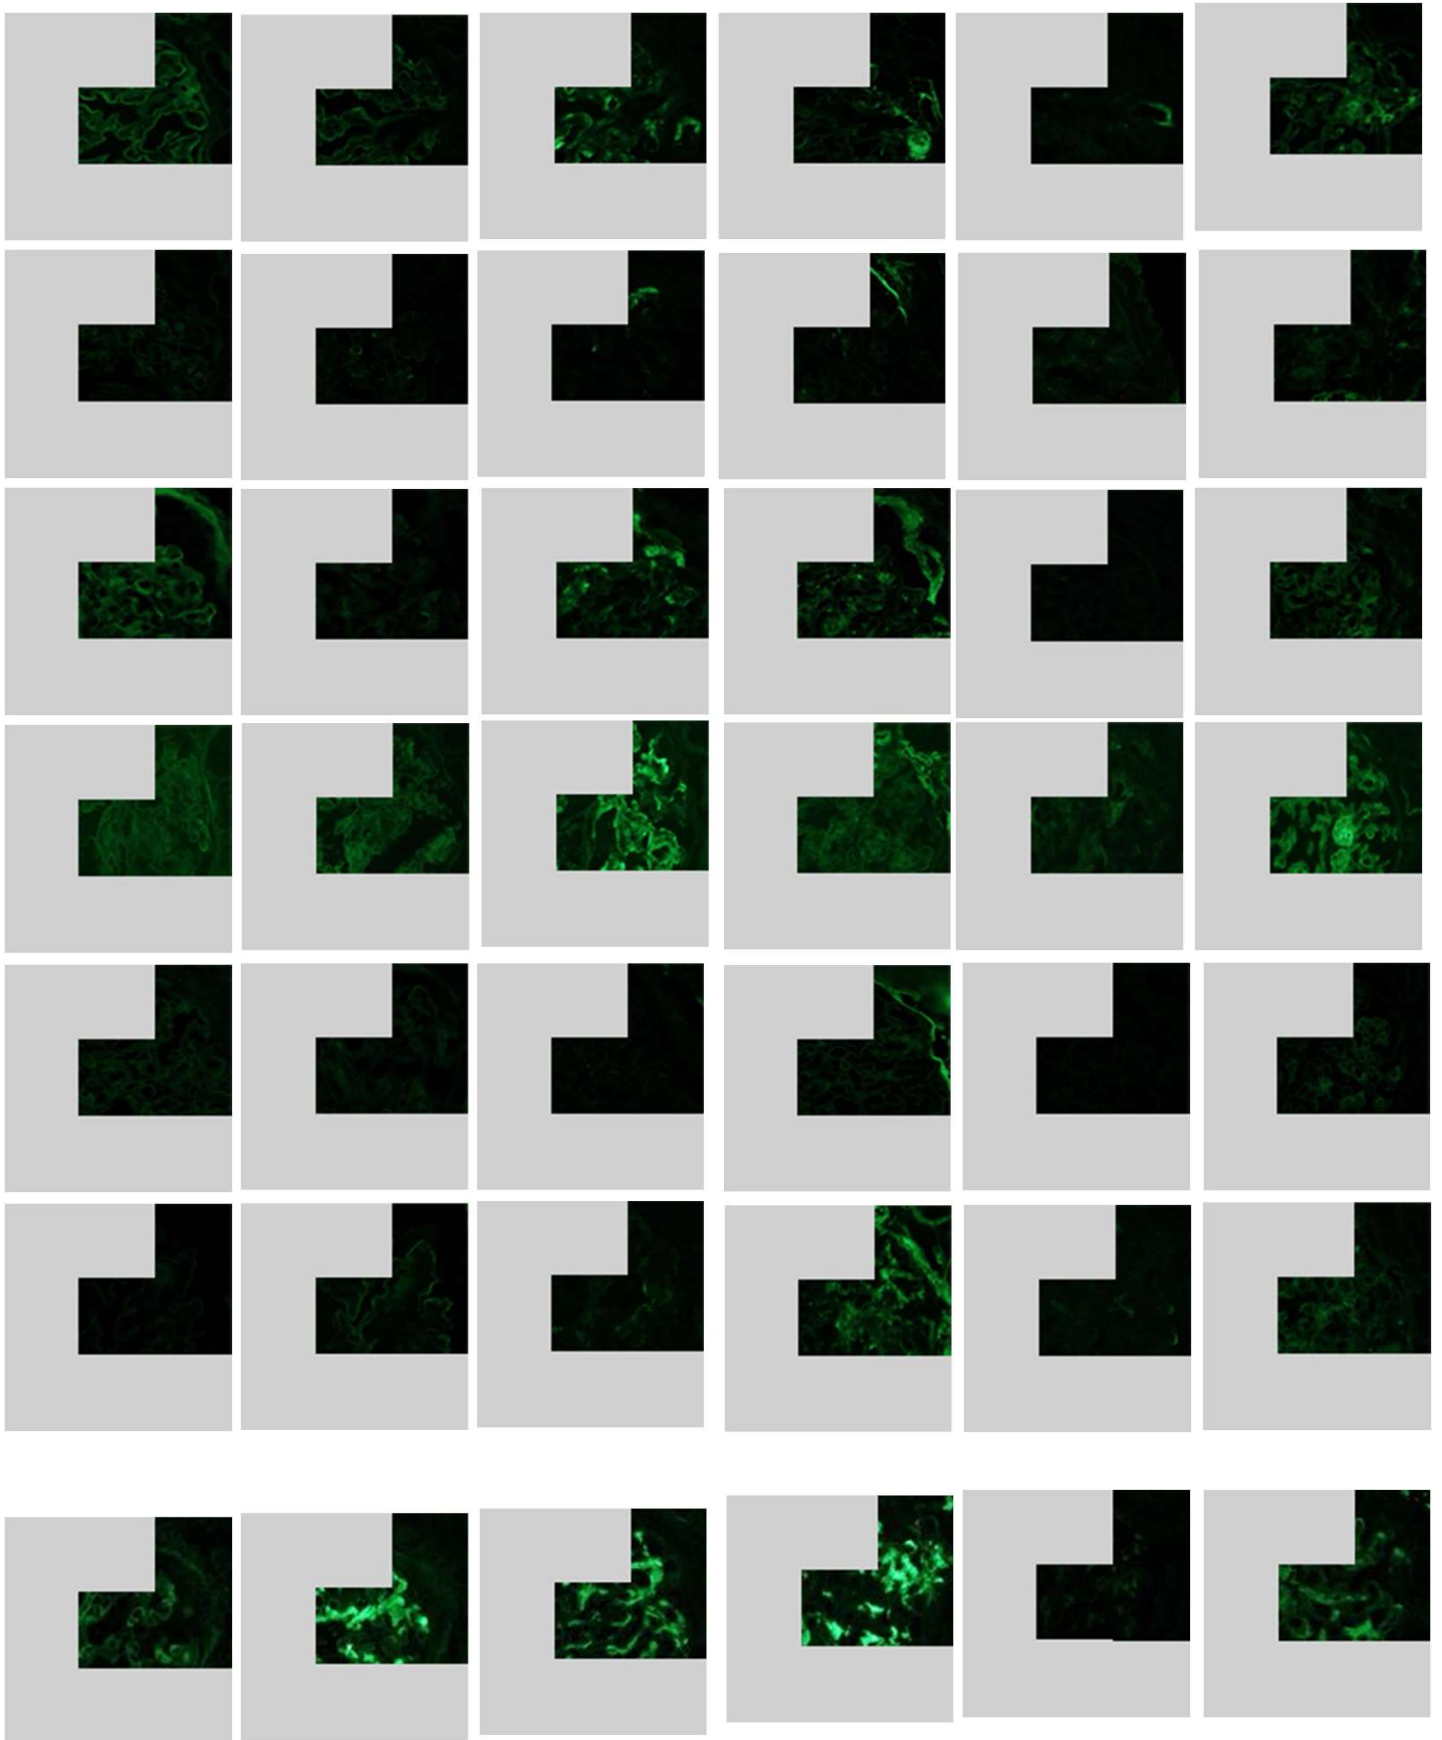

**supplementary Figure. S13**  
**Lime analysis for patient #1 images with completely diagnosis**  
**program #1**



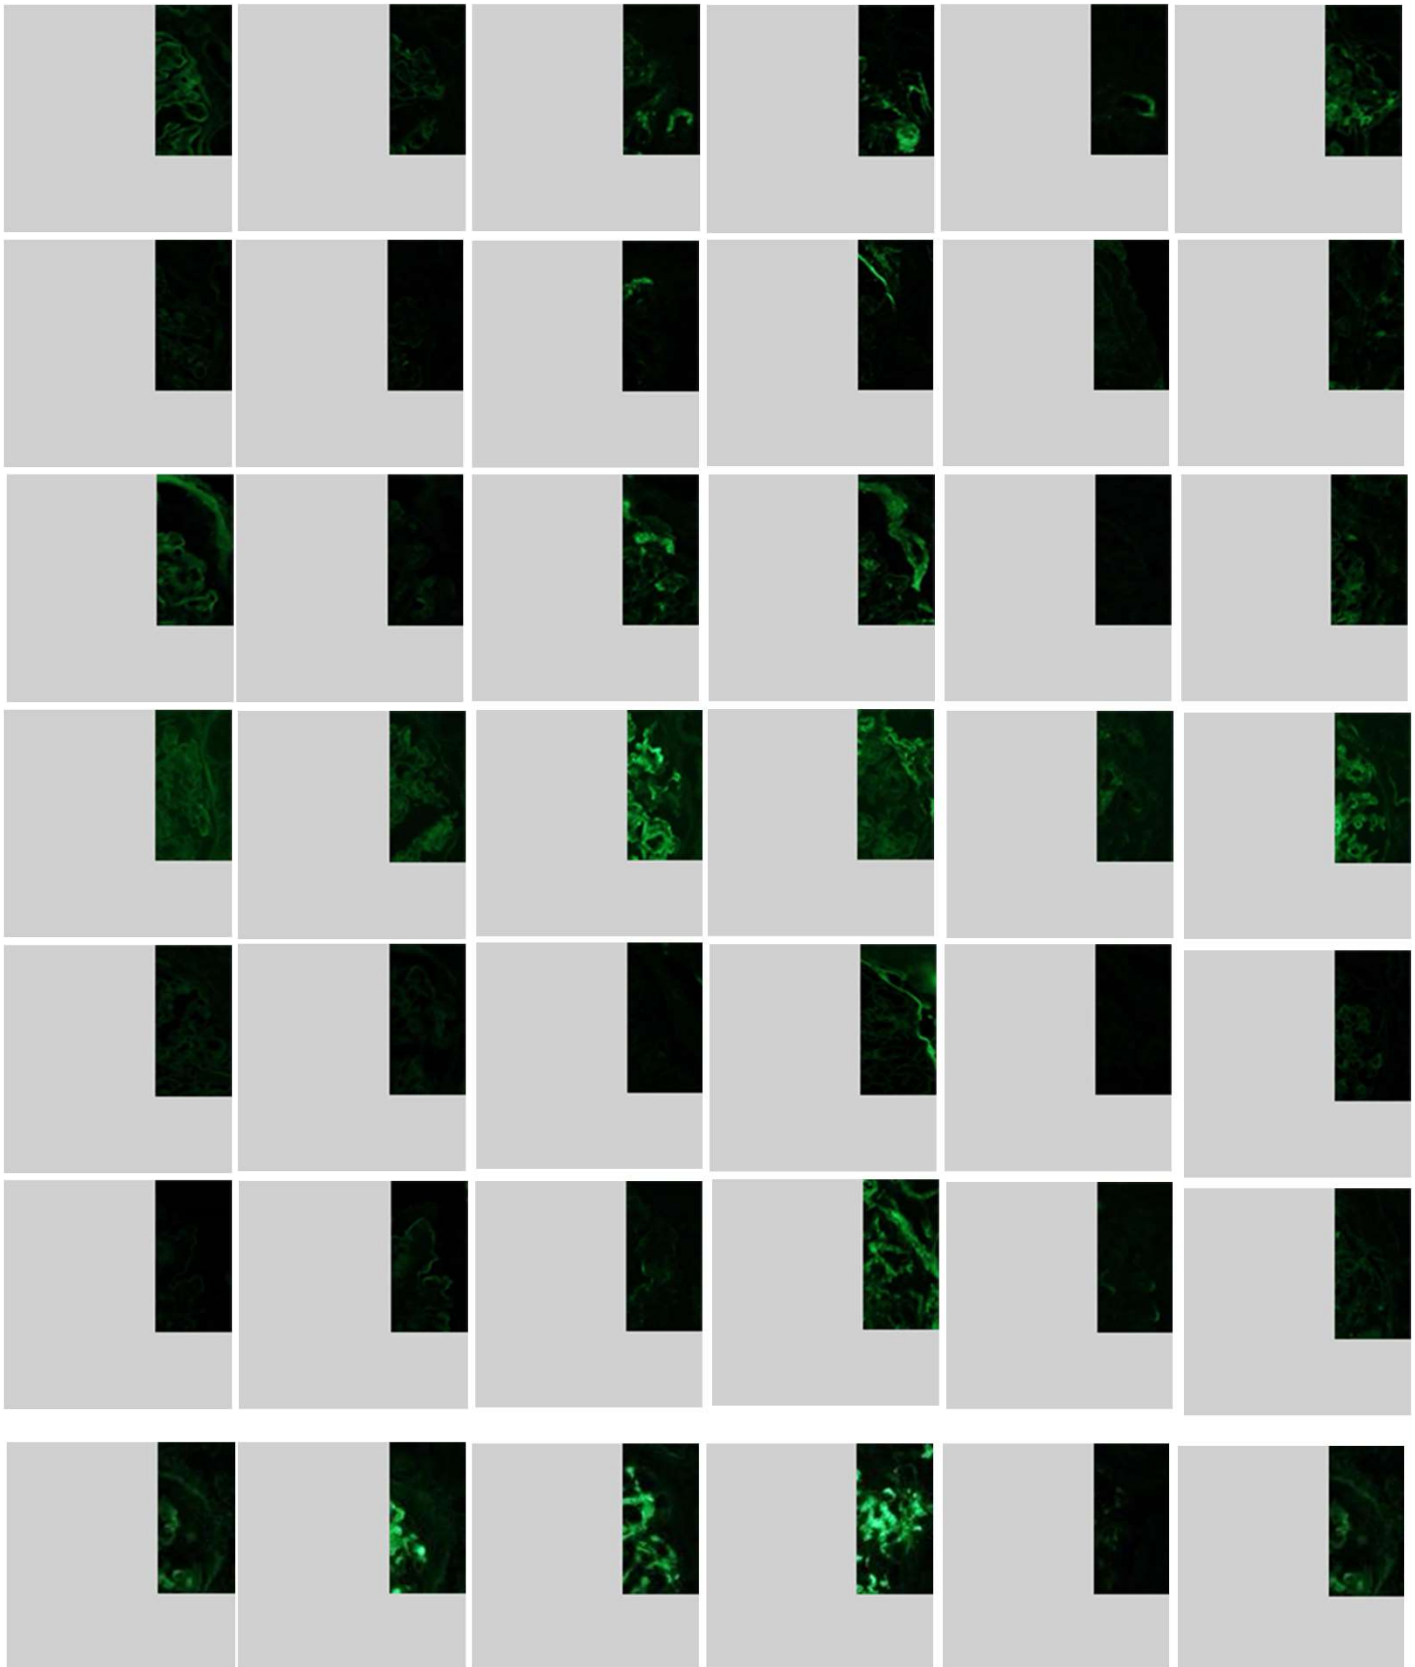

**supplementary Figure. S14**  
**Lime analysis for patient #1 images with another completely**  
**diagnosis program #6**
